# A critical assessment of the detailed *Aedes aegypti* simulation model Skeeter Buster 2 using field experiments of indoor insecticidal control in Iquitos, Peru.

October 3, 2021

**Authors:** C.E. Gunning<sup>1,6\*</sup>, A.C. Morrison<sup>2,3</sup>, K.W. Okamoto<sup>4</sup>, T.W. Scott<sup>5</sup>, H. Astete<sup>2</sup>, G.M. Vasquez<sup>2</sup>, F. Gould<sup>6,7</sup>, A.L. Lloyd<sup>7,8</sup>

## Affiliations

\* Corresponding author

<sup>1</sup> Odum School of Ecology, University of Georgia, Athens, GA 30602, USA

<sup>2</sup> Department of Virology and Emerging Infections and Department of Entomology, U.S. Naval Medical Research Unit No. 6, Lima and Iquitos, Peru

<sup>3</sup> Department of Pathology, Microbiology, and Immunology, School of Veterinary Medicine, University of California, Davis, CA, USA

<sup>4</sup> Department of Biology, University of St. Thomas, St. Paul, MN, USA

<sup>5</sup> Department of Entomology and Nematology, University of California, Davis, California, USA

<sup>6</sup> Department of Entomology and Plant Pathology, North Carolina State University, Raleigh, North Carolina 27695, USA

<sup>7</sup> Genetic Engineering and Society Center, North Carolina State University, Raleigh, North Carolina 27695-7565, USA

<sup>8</sup> Biomathematics Graduate Program and Department of Mathematics, North Carolina State University, Raleigh, North Carolina 27695-8213, USA

## Abstract

The importance of mosquitoes in human pathogen transmission has motivated major research efforts into mosquito biology in pursuit of more effective vector control measures. *Aedes aegypti* is a particular concern in tropical urban areas, where it is the primary vector of numerous flaviviruses, including the yellow fever, Zika, and dengue viruses. With an anthropophilic habit, *Ae. aegypti* prefers houses, human blood meals, and ovipositioning in water-filled containers. We hypothesized that this relatively simple ecological niche should allow us to predict the impacts of insecticidal control measures on mosquito populations. To do this, we use Skeeter Buster 2 (SB2), a stochastic, spatially explicit, mechanistic model of *Ae. aegypti* population biology. SB2 builds on Skeeter Buster, which reproduced equilibrium dynamics of *Ae. aegypti* in Iquitos, Peru. Our goal was to predict the response of mosquito populations to perturbations by indoor insecticidal spraying and widespread destructive insect surveys.

To evaluate SB2, we conducted two field experiments in Iquitos, Peru: a smaller pilot study in 2013 (S-2013) followed by a larger experiment in 2014 (L-2014). Here, we compare model predictions with (previously reported) empirical results from these experiments. In both simulated and empirical populations, repeated spraying yielded substantial yet temporary reductions in adult densities. The proportional effects of spraying were broadly comparable between simulated and empirical results, but we found noteworthy

differences. In particular, SB2 consistently over-estimated the proportion of nulliparous females and the proportion of containers holding immature mosquitoes. We also observed less temporal variation in simulated surveys of adult abundance relative to corresponding empirical observations. Our results indicate the presence of ecological heterogeneities or sampling processes not effectively represented by SB2. Although additional empirical research could further improve the accuracy and precision of SB2, our results underscore the importance of non-linear dynamics in the response of *Ae. aegypti* populations to perturbations, and suggest general limits to the fine-grained predictability of its population dynamics over space and time.

## Introduction

Despite widespread prevention efforts, the public health impact of dengue has increased significantly over the past 50 years, both in overall burden and expanded geographic distribution. The most common interventions for disease prevention to date have focused on dengue's primary vector, *Aedes aegypti* [1–4]. And, while ongoing efforts aimed at the development of vaccines and novel vector control strategies show potential, broadly effective tools are not expected to be available for public health application in the short-term [5]. Unfortunately, vector control as currently practiced has yielded inconsistent and generally disappointing results [2, 6–8] in part due to gaps in our understanding of *Ae. aegypti*'s ecology and life history [9–12].

*Ae. aegypti* is adapted to an anthropophilic lifestyle: adults live in close association with humans, females feed almost exclusively on human blood [13, 14], and larvae develop in water-filled containers, mostly located in and around households [9, 15, 16]. As such, transmission of dengue virus is largely driven by interactions between *Ae. aegypti* and humans within and around human dwellings. To better understand these processes, numerous biological process models have been developed to simulate *Ae. aegypti* population dynamics [17–20] and transmission of dengue virus [21]. Yet we lack critical assessments of existing models' ability to predict non-equilibrium *Ae. aegypti* population dynamics [22, 23] or dengue epidemiology [24, 25]. Factors complicating predictions of *Ae. aegypti* population dynamics include heterogeneity of vector biotic and abiotic habitat, as well as parameterization of relevant biological processes, such as mosquito life history. Although recent simulations of *Ae. aegypti* have included insecticidal interventions [21, 26], to date, models of *Ae. aegypti* dynamics have not been tested to determine whether they can reliably predict the impacts of vector control measures.

In previous work we developed Skeeter Buster (SB), a biologically detailed, agent-based stochastic simulation model of *Ae. aegypti* population dynamics that aimed to address the dual questions of spatiotemporal detail and empirical realism [18]. SB was built upon a biologically detailed model of *Ae. aegypti* (CiMSIM) that parameterized biological processes that researchers and practitioners considered critical to predicting *Ae. aegypti* population dynamics [17, 22, 27]. Because CiMSIM did not include any spatial structuring or stochasticity, it did not address the expected heterogeneity of *Ae. aegypti* populations in urban areas, the impacts of low densities of adult mosquitoes, or the consequences of mosquito movement across a landscape of separated, discrete habitats (i.e., human dwellings). SB was parameterized with values for Iquitos, Peru, and its performance was initially evaluated for correspondence with the observed, unperturbed dynamics of *Ae. aegypti* in that location [23, 28].

Vector suppression efforts necessarily perturb mosquito populations, whose subsequent responses must be considered in the design and implementation of control strategies [29–31]. To better understand the response *Ae. aegypti* populations to perturbations, we designed a series of two field experiments in Iquitos using insights gained from SB. A smaller pilot experiment was conducted in 2013 (henceforth S-2013), followed by a larger and more comprehensive experiment conducted in 2014 (henceforth L-2014) [32]. During each experiment, we used indoor ultra-low volume (ULV) insecticide spraying of individual households to suppress *Ae. aegypti* populations in a region of the study area, and also included an unsprayed buffer area. In these experiments, we employed non-residual ULV spraying and did not incorporate larvicide in order to differentiate the immediate impacts of suppression efforts from subsequent population dynamics. The resulting dataset represents one of the most detailed accounts available of the spatiotemporal impact of

area-wide spray interventions at a neighborhood spatial scale.

Spatial heterogeneity of suppression efforts and responses by mosquito populations can also impact control strategies [33]. To better capture spatial heterogeneity in data from the two field experiments, we substantially revised SB. The resulting model, Skeeter Buster 2 (SB2), uses the empirical date and location of sampling (household surveys of larval habitat and adult abundance) and ULV spraying. This allowed us to simulate each experiment and then directly compare simulated observations to experimental survey results.

Our primary objective is to assess the performance of SB2 against empirical observations of the two field experiments. We first present model predictions of the expected underlying dynamics of mosquito populations in order to assess their response to ULV spraying and destructive sampling (i.e. removal of collected adults and immatures during field surveys). We next compare simulated observations with empirical observations. We identify areas of concordance between empirical and simulated results, and explore predictions of the model that diverge from the empirical data. Ultimately, we seek to predict when, and for how long, indoor space spraying reduced mosquito populations, and to identify key processes that A) limit the efficacy of indoor ULV insecticidal vector control, and B) drive the post-spraying recovery of mosquito populations. We also discuss noteworthy sources of uncertainty, and address the usefulness of SB2 (and similar models) in future vector control research.

## Methods

### Iquitos, Peru

Iquitos is the largest urban center in the Department of Loreto, situated in the Amazon Basin of north-eastern Peru. Citywide vector monitoring and control efforts have been ongoing in Iquitos since 2002 [15, 34–37]. Here we focus on two field experiments that were conducted in 2013 and 2014 in separate neighborhoods in the Iquitos district in the city of Iquitos (Figure 1): an initial smaller pilot study (S-2013) and a larger follow-up (L-2014). These experiments evaluated the impact of non-residual, indoor ultra-low volume (ULV) pyrethroid spraying (henceforth spray or spraying) on *Ae. aegypti* populations. Each experiment was spatially configured to provide a central area that was sprayed (the **spray sector**) surrounded by an area that was not sprayed (the **buffer sector**). Here we use SB2 to simulate, as closely as possible, the empirical details of each experiment, including regional weather, adult and immature surveys, and spray interventions. Our primary goal is to compare simulated and empirically observed adult mosquito abundances, and to thus assess the accuracy of SB2 predictions.

Details of the study area, experimental design, and observed outcomes, along with a detailed ethics statement, are provided in Gunning et al. [32]; a brief overview is provided below.

### Field Surveys

Field workers attempted to survey every study house exactly once in each experimental time period by conducting a methodical, full circuit of the study area. These survey **circuits** typically lasted 2-4 weeks (up to six weeks in L-2014, see Table S1 in Gunning et al. [32]). Adult surveys recorded the number of adults captured per house (collected using Prokopack aspirators [38]) and the parity of captured females, which was assessed by dissection and inspection of ovaries. Container surveys recorded all identifiable water-holding containers (i.e., potential larval habitat) in and around each surveyed house, including container type, dimensions, location (inside/outside), and water fill patterns (passive rain-filled, active rain-filled via roof or rain gutter, manually filled by resident). The presence and number of *Ae. aegypti* eggs, larvae, and pupae in each container were recorded, and positive containers were then emptied of water and immature insects. Note that field workers destroyed and/or removed all sampled insects (adults and immatures) from the surveyed house.

Each experiment commenced with an initial baseline circuit (C1, 65-72% of houses successfully surveyed) that we used as a pre-intervention reference. Most circuits included adult and container surveys,

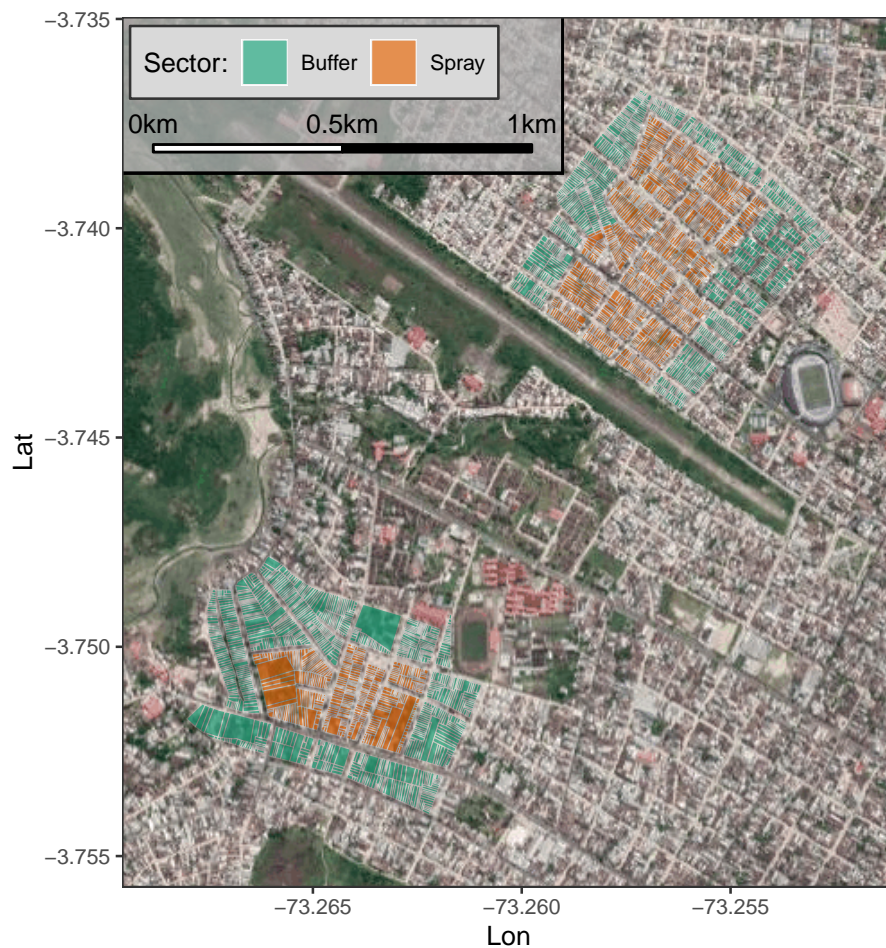

Figure 1: Satellite map of Iquitos, Peru. Experimental sectors are shaded. The smaller S-2013 area is to the South. The larger, northern L-2014 area borders an abandon air strip on its northwest edge.

but only adult surveys were conducted during spray circuits (see also Figures 2-3 in Gunning et al. [32]).

## Spray Intervention

During each field experiment, experimental ULV spraying (treatment) was conducted in a set of six **spray cycles**, where each spray cycle lasted approximately one week. During each spray cycle, spray teams visited and attempted to spray every house in the spray sector exactly once (in this case, the six spray cycles together were considered a single circuit). Adult surveys of sprayed houses were carried out either immediately prior to spraying (S-2013) or 1-4 days after spraying (L-2014, see also Figure 2 in Gunning et al. [32]). In addition, during L-2014 an unscheduled, emergency citywide spraying event (i.e., in both sectors) was conducted by the Ministry of Health in response to an impending dengue epidemic.

During scheduled experimental spraying, small screened cages, each containing 25 adult *Ae. aegypti* from a recently collected laboratory colony (Gunning 2018), were placed in randomly-selected houses immediately prior to spraying as a bioassay to estimate spray efficacy based on percent mortality of susceptible mosquitoes in the cages.

## Simulation Overview

Both SB and SB2 model the population dynamics of *Ae. aegypti*. SB2 includes modifications to SB that revised the spatial representation of houses to simulate key experimental events, including per-house spraying and mosquito sampling. SB2 also streamlines the process of specifying, running, and exploring



different model configurations. Unless otherwise noted, model behavior is conserved between SB and SB2 (see Supplemental Text for additional details).

In brief, SB2 models individual adult female *Ae. aegypti*, and cohorts of adult males and those of immature stages: eggs, larvae, and pupae. Adult *Ae. aegypti* mosquitoes (henceforth adults) dwell within and move among houses, which contain larval habitat (containers). Adult movement depends on the availability of mates and larval habitat (we assume human hosts are available in all houses). Adult females mate and subsequently lay eggs in water-filled containers, where container oviposition choice depends on container volume and the presence of a cover or lid, and larval development depends on weather and food availability. Survival of all life stages depends on temperature. Survival of adults and eggs also depends on water vapor pressure deficit, which is a function of temperature and relative humidity. Finally, SB2 models per-house destructive sampling of adults and immature insects within containers (i.e., eggs and larvae), as well as the impacts of indoor ULV spraying on adults.

As in Gunning et al. [32], the house is our basic unit of spatial observation, while the relative location of houses and blocks specifies the space through which adult mosquitoes move. Each house is directly connected to zero or more neighboring houses based on geographical distance. In addition, houses are grouped by block, and each block is connected to zero or more neighboring blocks. In local dispersal, adults move among neighboring houses within a block. Between-block dispersal allows an adult to move to a random house in a neighboring block. Unlike Magori et al. [18], SB2 does not include a long-range dispersal term, though adults may traverse the simulated area via multiple steps of between-block dispersal.

## Simulation Configuration

We generated spatial configurations for each experiment from a suite of GIS files of Iquitos (as of Jan 2016). The number and configuration of containers within each house were specified by initial baseline surveys for each experiment [32]. A summary of each field experiment’s configuration, including total number of houses and containers, containers per house, and container-free houses by sector, is shown in Table 1 (see also Table S1). The spatial distribution of container food input is shown in (Figure 2, see also Figure S1). Weather observations were taken from Coronel Francisco Secada Vignetta International Airport (Station 84377099999, see Figure S2). For additional details, see SI Text.

We sampled from the simulation outputs as if we were conducting empirical survey circuits of the experimental areas. This provided data at a comparable scale to those from the empirical surveys. The timing and location of simulated surveys and spray events was based on detailed records of the two field experiments [32]. In L-2014, the exact date of 164 spray events within the spray cycle was unknown (3.3% of 4,840 events, excluding MoH spraying); here, the onset of the spray cycle was instead used. Adult capture probability (equal to 0.29) was taken from previously estimated sampling exhaustion curves using Prokopack aspirators in household contexts [39]. We assume uniform binomial sampling of adult mosquitoes, i.e., that adults were captured independently and with equal probability regardless of across time, location, sex or age. Spray efficacy was estimated separately for each experiment via mean observed control cage mortality [32]. Key simulation parameters are listed in Table S2.

Table 1: Summary of model configuration. To determine the food input scaling factor, we minimized the difference between field and simulation of the mean adult population in the 2013-2014 buffer sector. The result is a per-container mean food input of 0.63, and a per-house mean food input of 1.57 and 1.16 for S-2013 and L-2014, respectively. See Table S2 for parameter details.

| Experiment | Sector | Houses | Container-Free Houses | Containers | Containers/House |
|------------|--------|--------|-----------------------|------------|------------------|
| S-2013     | All    | 1240   | 147                   | 3028       | 2.442            |
| S-2013     | Buffer | 824    | 87                    | 2065       | 2.506            |
| S-2013     | Spray  | 416    | 60                    | 963        | 2.315            |
| L-2014     | All    | 2255   | 435                   | 4163       | 1.846            |
| L-2014     | Buffer | 1099   | 210                   | 2044       | 1.860            |
| L-2014     | Spray  | 1156   | 225                   | 2119       | 1.833            |

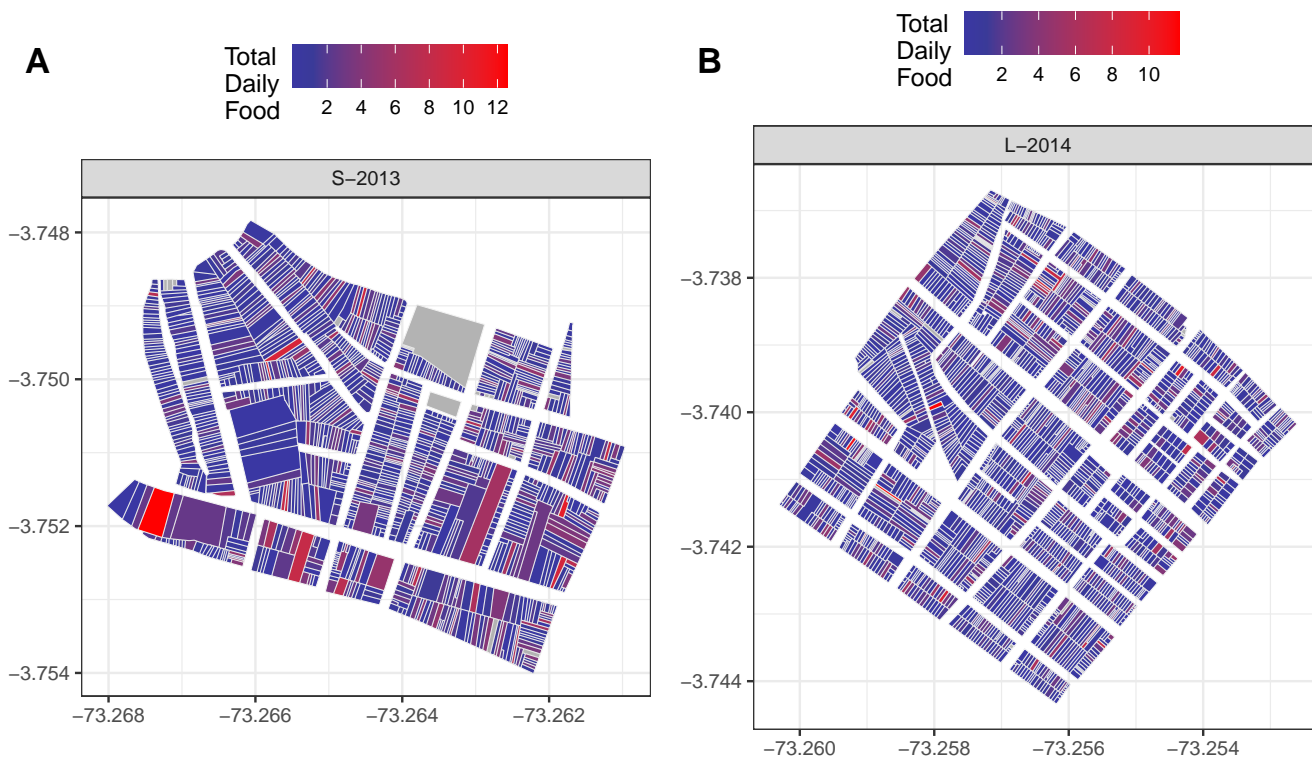

Figure 2: Details of simulation spatial configuration. Each polygon contains 1 or (rarely) more houses. Houses are grouped by blocks, which are separated by streets. Adult local migration occurs between neighboring houses within each block (see text for details). Color shows total daily food input per polygon. Polygons with no surveyed containers are shown in gray. See also Figure S1.

## Model Scenarios

We present several different model scenarios. For each scenario, an ensemble of 100 simulations was run; each run simulated and discarded one year of burn-in time. Simulations began with the onset of surveying and concluded one week after the conclusion of surveying.

Our reference experimental scenario was developed based on detailed records from field experiments, including container surveys, adult surveys, and spray events. We used this scenario to compute a single multiplicative scaling factor of container food input that calibrated the observed mean adult population density in the buffer sector (averaged across both experiments) between simulation and experimental results. Except where noted, all other parameters were as described in previous work [18].

To better characterize model behavior, we developed six additional scenarios that selectively modified the reference scenario. To compare the expected impact of field surveys versus spraying, we added scenarios with: (1) no intervention, (2) only adult sampling, and (3) only container sampling. To assess the expected impact of weather and climate, we added a scenario that ran for 10 years (2000 to 2010, plus burn-in) with no spraying or surveying. Note that in the above four scenarios, we only consider the expected (unobserved) population dynamics. Finally, to assess the impact of spray efficacy, we added two scenarios that artificially varied spray efficacy to a low and high value (50% and 100%, respectively).

## Data Analysis

Overall, we focus on variation between simulation runs within an ensemble, rather than on variation between houses within a given simulation. Variation within each ensemble is represented as 95% prediction intervals (PI).

### Expected dynamics in unperturbed conditions

We first provide an overview of simulated *Ae. aegypti* dynamics reported by day, assuming non-destructive and complete observation of mosquitoes, including mean adults per house (Adult) and proportion nulliparous females (Prop Null). While this detailed view can provide useful insight into SB2's dynamical behavior, these results cannot be directly observed in the field due to logistical constraints, and thus are not falsifiable.

For the long-running intervention-free scenario, we compute the correlation between weather and *Ae. aegypti* populations over the full time period, stratified by mosquito life-stage. This allows us to characterize the expected long-term response of mosquito populations to temperature, humidity (i.e., saturation deficit), and precipitation.

### Comparison to field experiments

For simulated sampling of houses (i.e., circuits), we report results grouped by experiment, sector, and circuit. Simulated sampling results can be directly compared to field experiment results [32], and are the primary focus of this study. Simulated sampling measures that we consider include mean *Ae. aegypti* adults per house (AA/HSE), Aedes house index (AHI, proportion of houses infested with adults), proportion of sampled adult females that are nulliparous (PrNF, proportion nulliparous females), and positive containers per house (PC/HSE, number of containers with immatures present). To help characterize the immediate response of adult populations to spraying, we provide a weekly summary of AA/HSE during the experimental spray period for both experiments. Note that container measures are only available in circuits where container surveys were conducted. We compute the difference between field and simulation results, and report the ensemble distribution of differences for each measure.

To assess the effects of intervention on each measure, we report the ratio between the buffer and spray sectors (Spray/Buffer) within each circuit, as well as the ratio between circuits (Circuit/Baseline) within the spray sector. These ratios are directly comparable with the respective contrasts shown in Figure 5 of Gunning et al. [32], where confidence intervals for empirical results are provided. We omit empirical statistical confidence intervals here because they are not directly comparable to simulation prediction intervals.

## Results

### Overview

We begin with an overview of our simulation's internal dynamics (Figures 3-5). Next, we summarize the ensemble distribution of simulated surveys of adult and immature mosquitoes (Figure 6) that, as described in the methods, were designed to mimic the empirical data collection. We then describe the spatial distribution and time course of simulated surveys during and after spray events and compare simulated survey results with empirical survey observations (Figures 7-8). Finally, we examine the effects of varying spray efficacy on adult densities (Figure 9). Unless otherwise noted, simulation survey results show ensemble summaries rather than individual model runs within an ensemble.

## Simulation Dynamics

The SB2 reference scenario was developed to mirror the S-2013 and L-2014 field experiments, including the location and timing of container surveys, adult surveys, and spray events. With this scenario we simulate the empirical field sampling and spraying that occurred in S-2013 and L-2014 (Figure 3). When we inspect the simulated but unobserved population dynamics for this scenario, we find that the first cycle of simulated spraying (mimicking S-2013 C2 and L-2014 C6) yielded a sharp and immediate decrease in the spray sector adult populations of both simulated experiments. However, only modest decreases are evident after the subsequent five spray cycles. The effect of simulated citywide spraying in L-2014 (C3) is approximately equivalent between sectors, as expected. This reference scenario also demonstrates considerable variation in adult populations over time, while variation among runs within the ensemble is modest by comparison. This high variability within but not between simulations suggests a large role of weather relative to demographic stochasticity.

In the reference scenario (Figure 3), substantial temporal variation is evident in the S-2013 buffer sector, despite no spray interventions. A close inspection of the buffer sector during scenarios that include adult and/or container sampling (Figure 4) shows that container sampling yields large drops in adult populations. Perturbations to adult populations caused by container sampling also affect the proportion of nulliparous female adults through shifting the adult age distribution (see below). The effects of simulated adult sampling, on the other hand, are modest relative to within-ensemble variation. Finally, scenarios that vary ULV spray efficacy (Figure 5) show a modest impact on the dynamics of adult densities relative to overall temporal variation, while increased spray efficacy yields modest and short-lived increases in proportion of nulliparous females.

To better characterize *Ae. aegypti* population dynamics in Iquitos in the absence of control measures or human intervention, and across numerous years of varying weather, we simulated a long-running scenario (2000-2010). We found that the long-term dynamical response of simulated mosquito populations to weather is consistent with expectations, with temperature, humidity, and precipitation exerting consistent and sometimes complex influences on all life stages (Figure S3).



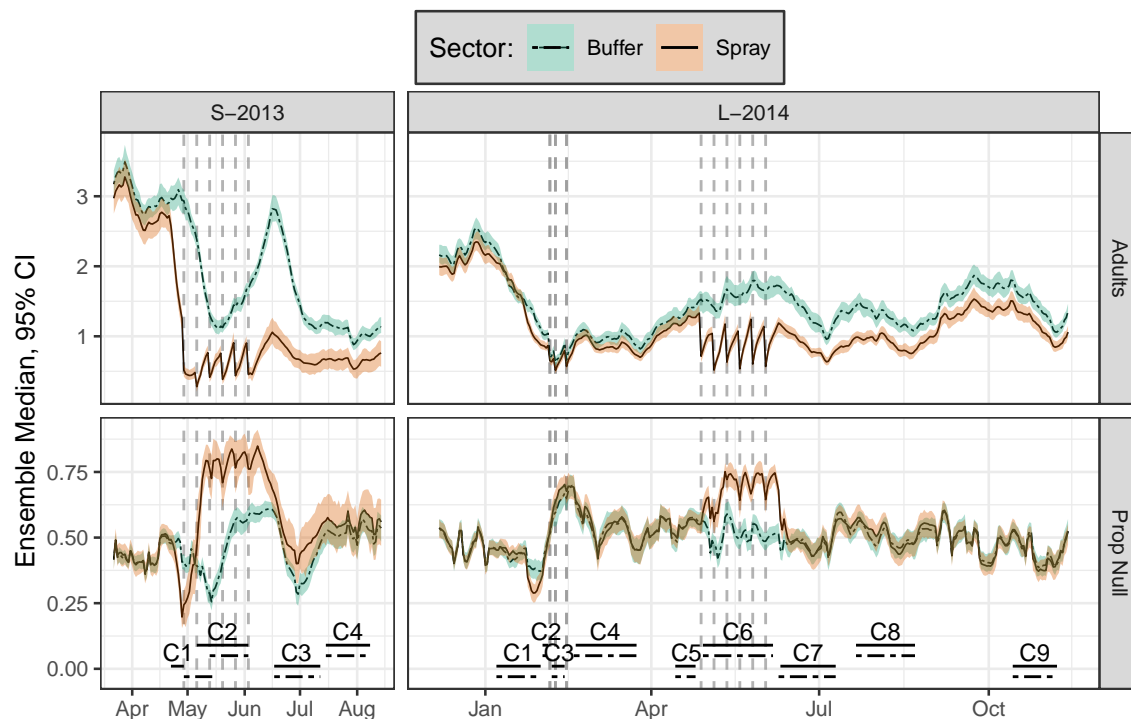

Figure 3: Daily time series of model dynamics for the default scenario (model states, not survey results). Colored shading shows ensemble 95% prediction interval (PI) for each sector, and lines within shading show ensemble medians (each ensemble is comprised of 100 runs). Vertical dashed lines shows spray events; lower horizontal lines show circuit durations by sector. Steep declines in adult densities early in each experiment appear to be caused by C1 container surveys. Note that C1 was delayed in the buffer sector of S-2013. All simulations include a 1-year burn-in period (not shown). Spray efficacy was set to the empirically observed control cage mortality: S-2013, 91%; L-2014, 72%.

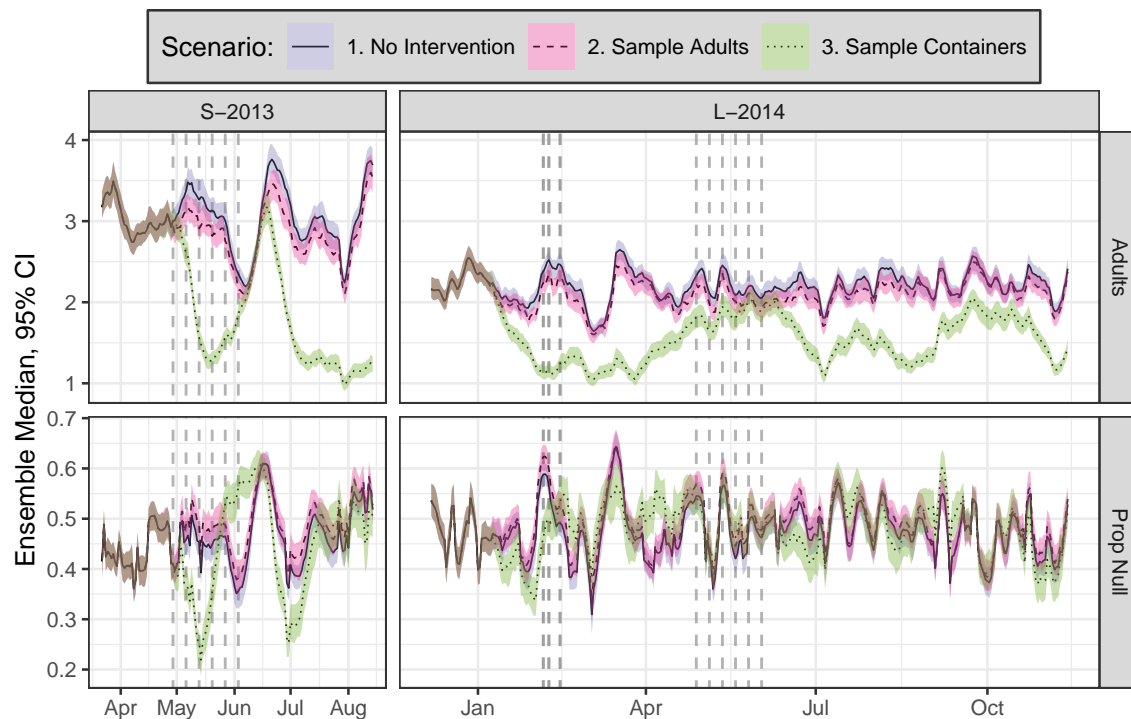

Figure 4: Daily time series of model dynamics for buffer sector, showing three scenarios: no intervention, adult sampling only, and container sampling only. In scenario 3, container sampling was not conducted during spray periods. See also Figure 3.

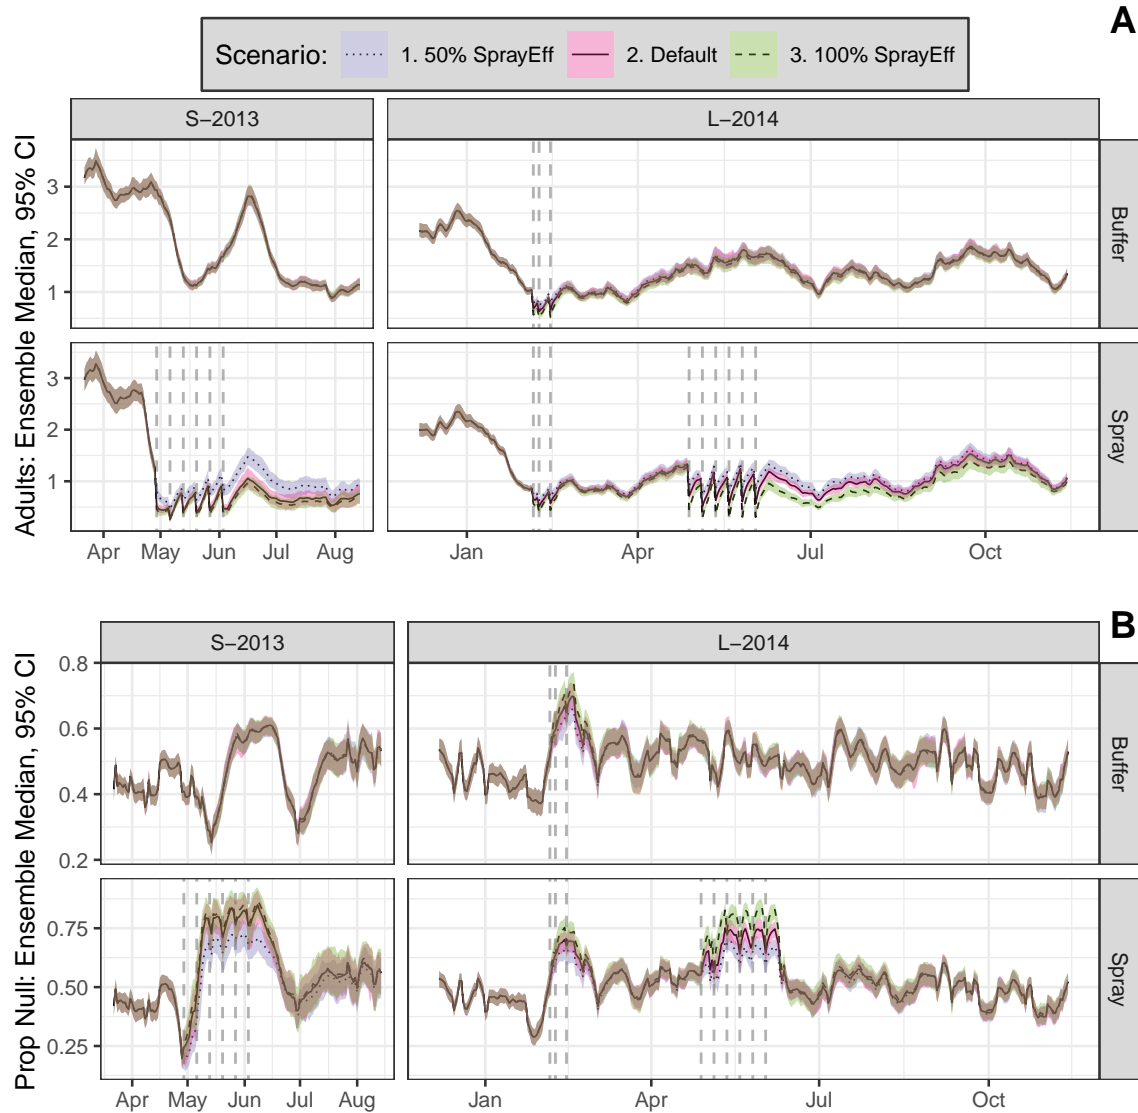

Figure 5: Daily time series of model dynamics for scenarios with differing spray efficacies (Default scenario efficacies: S-2013, 91%; L-2014, 72%). **A**, Adults. **B**, Prop Null. Top row, Buffer Sector; bottom row, Spray Sector. See Figure 3 for additional details.

## Comparison of Empirical and Simulated Results

Simulated survey results from the reference scenario (Figure 6) recapitulate model dynamics (above) at a much coarser timescale. Variation over time and between sectors is large relative to variation within the ensemble, the impact of container sampling on both sectors is particularly evident in S-2013, and adult abundance (as measured by AA/HSE and AHI) is reduced during and after spray events. Simulated spray events yield a modest increase in PrNF, since spraying and subsequent adult emergence shifts the age distribution of adult females away from older individuals. We observe some post-spray reduction in PC/HSE, though the sparsity of container surveys dictated by simulation of the experimental design limits our ability to detect patterns in immature insect presence.

Direct comparisons between the effects of experimental spraying in S-2013 and L-2014 are complicated by differing spray efficacy (91.2% versus 72.3%, respectively) and the time interval between spraying and subsequent adult surveys (seven days versus 1-4 days, respectively) (see also Figure 3 in Gunning et al. [32]). The relatively long intervals between field surveys makes it difficult to directly compare the empirical recovery rate, post-spraying, with the rapid recovery post-spraying seen in the full model outputs, particularly in L-2014 (Figure 3) where much of the recovery was within the interval between empirical field surveys. In addition, comparisons between model predictions and empirical observations are further complicated by the stochasticity and logistical heterogeneity inherent in any complex field experiment, from ULV spray applications to entomological surveys.

As in Gunning et al. [32], we describe the relative effects of spraying by contrasting between sectors (within circuit) for each measure, as well as between circuits (within the spray sector) (Figure 7). Here we compare the ratio of means between empirical results (observed point estimate) versus simulated results (ensemble median + 95% PI). Additional details are provided in Tables S3 and S4.

In simulations of S-2013 experimental spraying (C2, six spray cycles, 73.0-90.8% spray coverage), mean adult densities in the spray sector (AA/HSE, relative to buffer sector) were reduced by 47% (C2), 63% (C3) and 44% (C4) (Figure 7A, Table S3). Relative to C1, mean AHI in the spray sector was reduced by 38% (C2), 54% (C3), and 38% (C4) (Fig 7B, Table S4).

In simulations of L-2014 experimental spraying (C6, six spray cycles, 73.5-82.4% spray coverage), mean adult densities in the spray sector were reduced by 43% (C6), 43% (C7), 19% (C8), and 9% (C9) (Figure 7A, Table S3). Relative to C1, spray sector AHI was reduced by 39% (C6), 37% (C7), 21% (C8) and 14% (C9), (Figure 7B, Table S4). In addition, simulations of the Ministry of Health's short-duration citywide spraying during L-2014 C3 (both sectors, three spray cycles, 61.9-70.5% spray coverage) yielded modest reductions of mean AA/HSE and AHI in both sectors relative to the previous circuit (C2). We note that adults had recovered to approximately pre-intervention (C2) levels by the subsequent circuit (C4) (Figure 6 & 7B, Table S4).

Overall, simulation results broadly agree with empirical observations, yielding reductions in insect populations that were transient and variable in duration (Figure 7-8, Figure S4). However, simulations fail to capture initial differences in adult abundance between sectors in S-2013 (C1), and predict a sharp drop in C2 buffer sector AA/HSE and AHI that was not empirically observed. In S-2013, simulations underestimated the immediate effects of spraying on adults in C2 (Figure 7A). Finally, simulations underestimated the speed of recovery in both years, and failed to capture the dramatic rise in spray sector adult abundances seen in L-2014 in the months following spraying (C8-C9). Substantial differences were also observed between simulated and empirical PrNF.

Because of the logistically necessary time delays between most of the (block-stratified) field surveys, it was not generally possible to analyze insect abundance changes over short time scales (e.g., days and single weeks). However, weekly monitoring of adults during the experimental spray period, shown in Figure 8, reveals substantial week-to-week variation in empirical results during L-2014 that were not captured by simulations, possibly due to fine-scale operational variations in spray efficacy that were not simulated (see also Figure S3 in Gunning et al. [32]). In both years, however, simulations capture the sharp initial drop in adult densities at the onset of spraying, minimal further reductions from additional spray cycles, and a relatively rapid rebound after spraying concludes. This result in both simulated and empirical observations

is consistent with strong density dependence, a hypothesis also supported by the rapid return of adult mosquito populations to baseline levels once spraying concludes in both simulations and empirical results (Figure 7). Absent strong density dependence, we expect that repeated spraying would have continually decreased adult densities and, after spraying ceased, that adult densities would slowly recover to pre-spray levels.

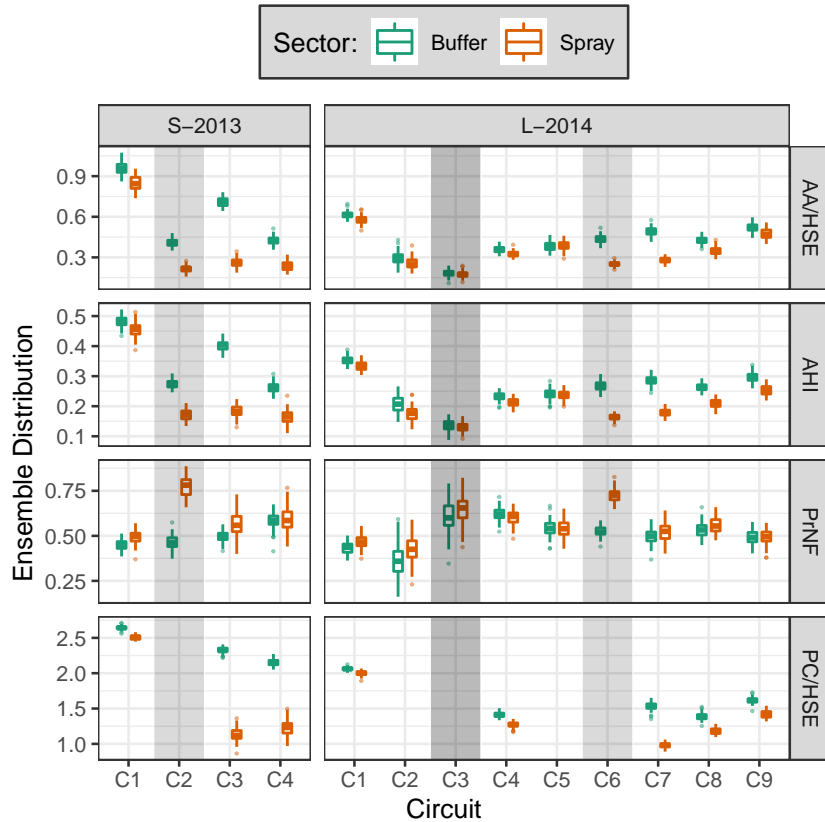

Figure 6: Simulated survey results. For each measure (row), sector (color), and circuit, a per-run mean was computed; boxplots of ensemble means are shown (default scenario, 100 runs). Vertical gray bars show periods when the spray sector was sprayed, except during L-2014 C3 (dark gray), when both sectors were sprayed. **AA/HSE**: *Aedes aegypti* adults per house. **AHI**: Adult House Index. **PrNF**: Proportion nulliparous females. **PC/HSE**: Positive containers per house. See also Figure S4.



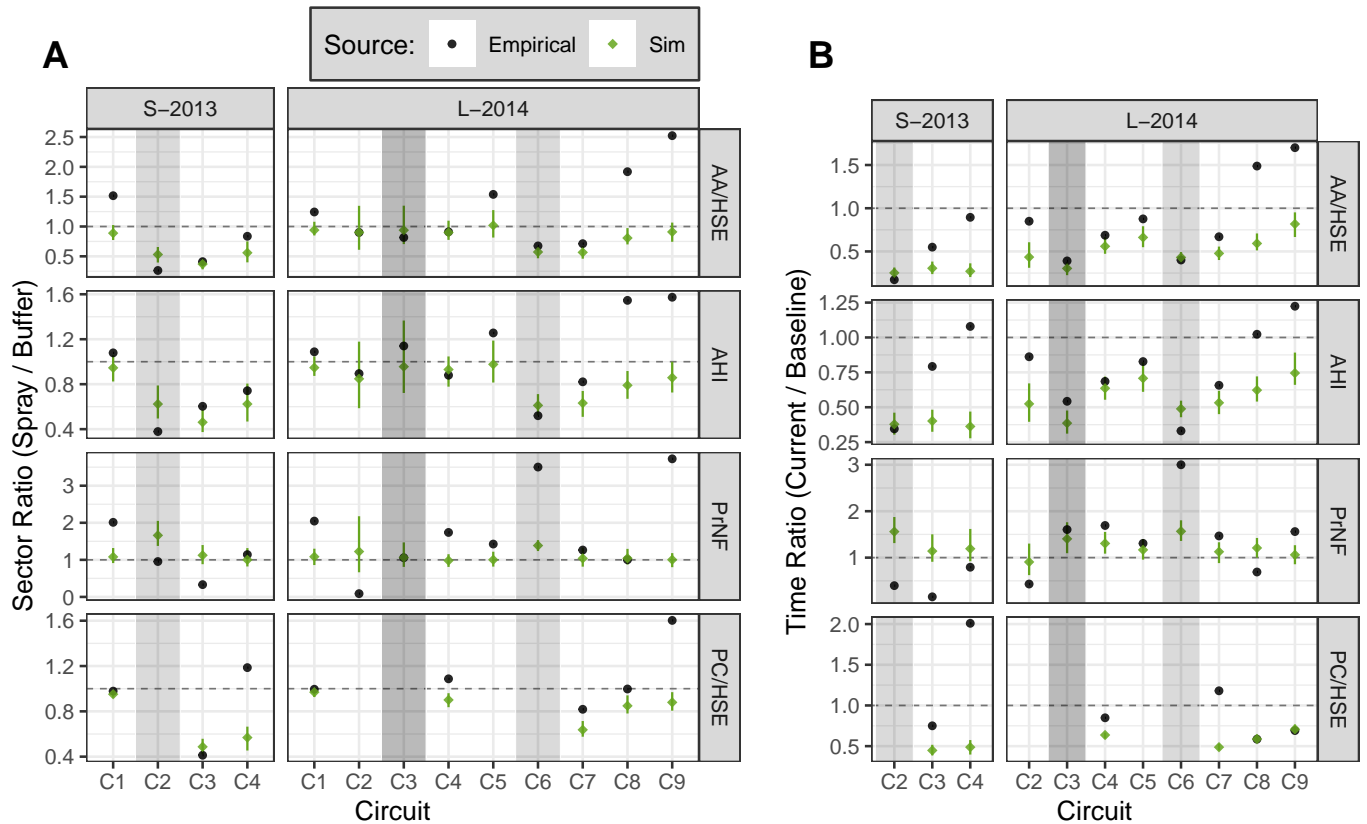

Figure 7: Contrasts between sectors (A) and circuits (B) for each measure (row), comparing simulated and empirical surveys (select circuits). Means were computed as in Figure 6; ratios of means are shown. **A**: ratio between sectors (spray / buffer) within each circuit. **B**: ratio of each circuit to baseline (C1) within the spray sector. Simulations show ensemble median ratio + 95% PI (default scenario, 100 runs). Shading indicates sprayed circuits, as in Figure 6. Horizontal dashed line shows no difference (unity). See also Tables S3-S4.

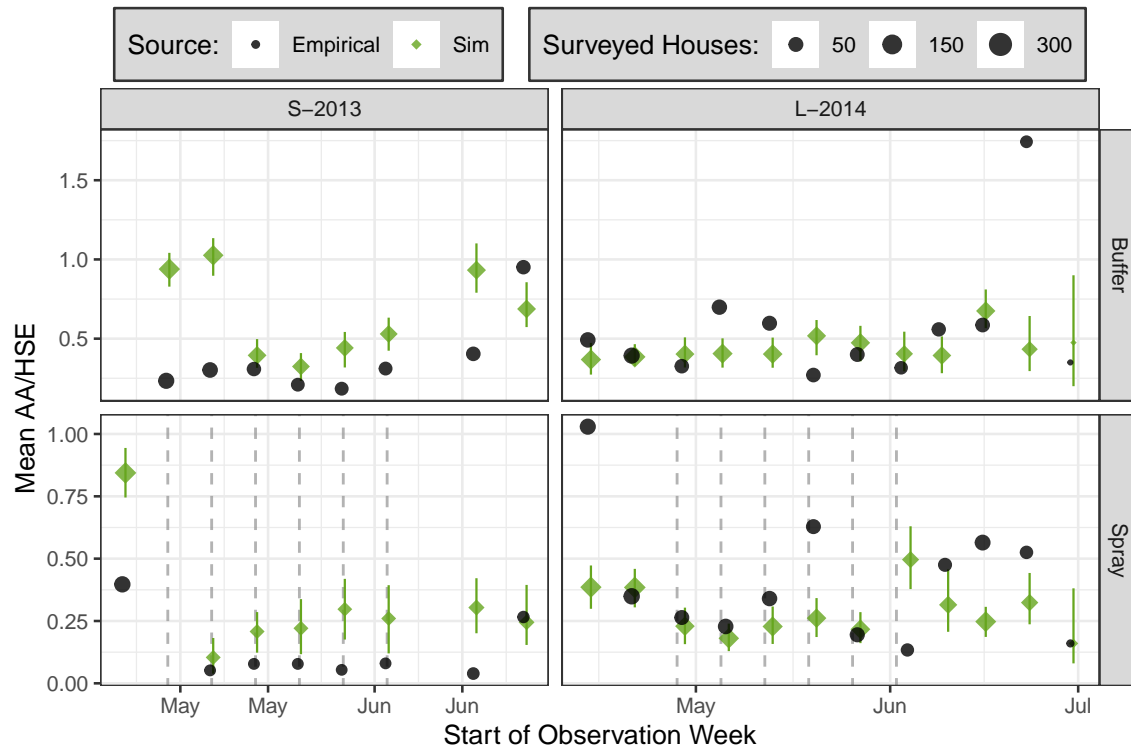

Figure 8: Detail of weekly mean AA/HSE within each sector (row) throughout experimental spraying, comparing empirical and simulated survey results (color). Simulation results show ensemble median + 95% PI. Vertical dashed lines shows approximate timing of spray cycles; during each cycle, a spray attempt was made at every house.

## Spray Efficacy

Scenarios that varied spray efficacy (Figure 9) cannot be directly compared to empirical results, yet they provide insight into the possible effects of increased insecticide resistance (decreased efficacy) or novel insecticides (increased efficacy). In S-2013, a simulated spray efficacy of 50% yielded modest reductions in spray sector adult densities in the treatment circuit (C2) relative to a much higher efficacy of 100% efficacy. In contrast, in simulations of the S-2013 spray sector, the circuit immediately after treatment (C3) yielded differences between ensembles that were small relative to between-circuit temporal variation in the S-2013 buffer sector. This suggests a modest effect of spray efficacy on the short-term control of *Ae. aegypti* populations relative to background temporal dynamics (e.g., weather) and demographic stochasticity. In L-2014, both sectors were subject to lower intensity spraying as part of the MoH's citywide intervention (C3, three spray cycles, 61.9-70.5% spray coverage). Here, modest differences are observed between 50% and 100% spray efficacy ensembles that quickly fade in subsequent circuits (e.g., C5). The effects of varying spray efficacy are larger and longer lasting during the higher intensity experimental spraying (C6, six spray cycles, 73.5-82.4% spray coverage), where differences between ensembles are still evident in C8, relative to the C3 MoH intervention.

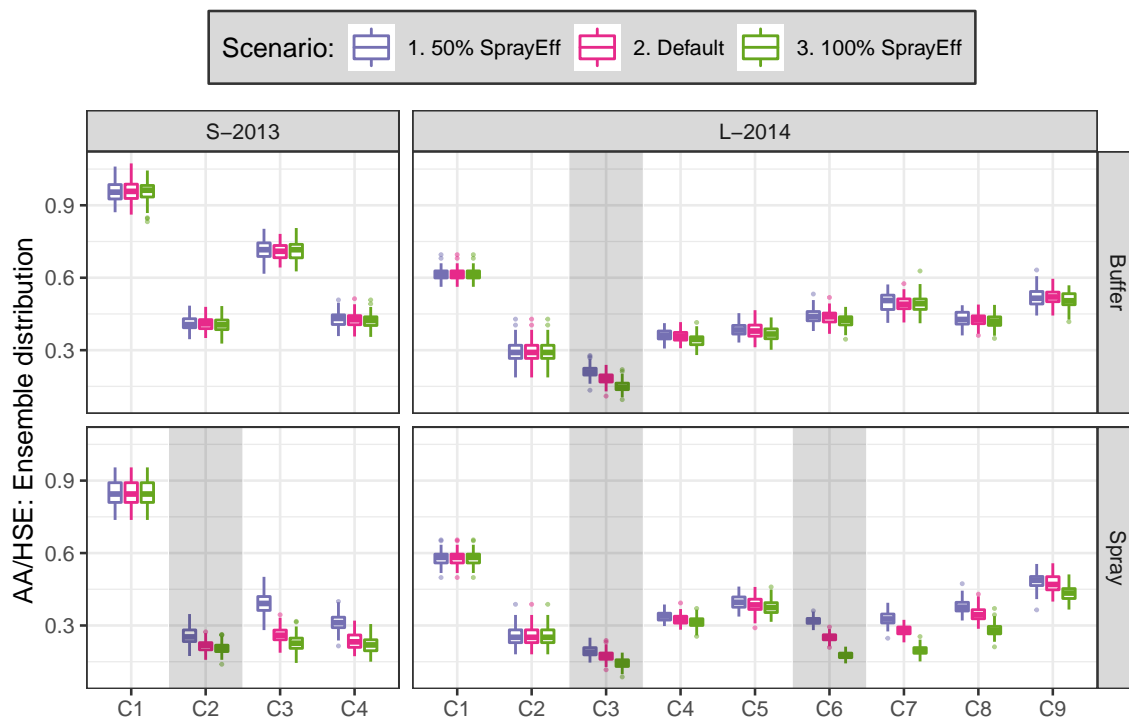

Figure 9: Comparison of simulated AA/HSE within sector (row) among different spray efficacies. See Figure 3 and Figure 6 for additional details.

## Discussion

The primary goal of this study was to test how well our biologically detailed model of *Ae. aegypti* population dynamics could reproduce the observed response of adult insect populations to experimental perturbations during two field experiments in Iquitos, Peru. In both simulated and empirical populations, repeated indoor ULV spraying with pyrethroids resulted in substantial yet temporary reductions in adult densities. Indeed, the proportional effects of spraying were broadly comparable between simulated and empirical results. Beyond the impacts of spraying, we found several noteworthy and unexpected differences between

empirical and simulated results, particularly for PrNF and PC/HSE, as well as less temporal variation in simulated surveys of adult abundance relative to corresponding empirical observations. We also found that simulated container sampling reduced expected adult densities substantially. These results suggest that larval control could aid in vector control in the absence of cryptic larval habitat, which we do not simulate (see below). Separately, simulation results indicated a minimal impact of destructive adult sampling on mosquito populations.

## Model Validation

Simulation models can assist in the design and interpretation of intervention efforts. However, a model's usefulness relies on the robustness and reliability of its predictions. Uncertainty quantification (e.g. Xu et al. [28]) can help quantify model robustness by assessing the sensitivity of model output to uncertainties that inevitably exist in its parameterization. This technique, however, is purely model-based and does not directly assess a model's accuracy. Comparison between model predictions and real-world data is known as model validation, which attempts to establish the ground truth of a model.

Model validation is a challenging task, particularly for detailed models that already require a large amount of data for the estimation of their many parameters [40]. In order to avoid circularity, model predictions must be tested against empirical data that is independent from that used to parameterize or otherwise fit the model. In many cases, this is achieved by dividing a data set into two parts: one used to fit the model (the “training” data) and one used to validate model predictions (the “testing” set). In the case of detailed field experiments, sufficient data for repeated out-of-sample validation would be very resource-intensive and thus rare.

The adequacy of a model's performance may also be highly context specific, such that Oreskes [41] argues for a cautious interpretation of the term “model validation”. Indeed, a model may perform well when describing an unperturbed system, particularly when fit to equilibrium-state data, but perform poorly when describing the same system when perturbed. The ability of a model to predict behavior of a perturbed system is a much stronger test of its performance, and is an important consideration if a model is used to predict the outcome of a large-scale control intervention.

Motivated by these observations, we designed and implemented the two field experiments described here, where we intensively monitored real-world mosquito populations before, during, and after major perturbations. We then compared these experimental results to ensembles of simulation runs that captured demographic stochasticity. The resulting model assessment constitutes a rigorous test of our detailed simulation model, and highlights several important considerations for future vector control research.

## Comparing Empirical and Simulated Results

Determining the key sources of disagreement between simulations and empirical observations remains an outstanding question. Our model was parameterized using the best available information in the literature and from expert opinion about *Ae. aegypti* life history and population dynamics [17, 18, 23, 28], together with more than a decade of intense field monitoring in Iquitos, Peru and elsewhere [32, 42]. In the interest of making an unbiased comparison, we have not tuned simulation parameters to match empirical results here, other than by adjusting the per-container daily food input to align simulation mean adult densities with field observations. A priori, we expect some differences between empirical and simulated results due to biotic and/or abiotic stochasticity. Disagreements could also stem from imperfect empirical observations, and from erroneous or incomplete expert assumptions about the biology and habitats of *Ae. aegypti* encoded in simulation dynamics. In addition, empirical field sampling could have been affected by a range of logistical and physical factors, including weather, survey staff, adult mosquito sex or blood-meal status. As such, attributing specific disagreements to particular simulation and/or field processes is challenging. Nonetheless, process-based simulations yield testable predictions and highlight areas of vector biology that deserve further attention, such as the role of density dependence in *Ae. aegypti* life history, and larval habitat and food availability. We explore several specific issues below.



**Female Age Distribution:** Adult mortality in our model is constant per unit time (i.e., Type II survivorship). Yet age-dependent survivorship of *Ae. aegypti* has been proposed based on field release-recapture field studies [43] and cage studies [44]. As others have noted [43, 45], reliable estimates of vector survivorship are difficult to obtain, but may play a key role in the epidemiology of vector-borne diseases [46, 47]. Our model provides testable predictions of adult female age distribution in response to vector control measures. Here, our simulation results differ strikingly from estimates of the absolute PrNF observed in the Iquitos field studies, while broadly reproducing the direction and duration of this response in L-2014 (Figure 7). We note that field measure of adult parity, which were based on visual inspection of dissected gonads, constitute a potential source of error, as variation in reproducibility among the field observers was evident. Nonetheless, this disagreement between model output and empirical observations of PrNF deserves further attention, since it indicates either that some element of *Aedes* life history has been mischaracterized by previous research, or that our current understanding of *Aedes* life history has not been properly represented in SB2.

**Density Dependence and Larval Habitat Productivity:** Competition between larvae within containers for food resources is believed to be the main process regulating *Ae. aegypti* adult population densities [48]. This competition impacts larval development time, the probability that larvae successfully complete their development, and the size of emerging adults [16, 30]. Our model explicitly tracks food resources within containers, but unfortunately these dynamics (and the resulting impact on larvae) are poorly characterized in natural settings. While laboratory and cage studies have provided some insight [48, 49], exactly how the food inputs used in these studies relate to field systems remains unclear. In addition, food resource dynamics can lead to delayed density dynamics, where the current resource level of a container depends on the consumption history of current and previous larval cohorts [29, 50]. Such delayed density dependence has well-known potential for overcompensatory dynamics [51] and could explain the dramatic increase in spray sector adult densities observed late in L-2014. The conspicuous absence of a corresponding increase in the S-2013 spray sector raises difficult questions about how long an artificially perturbed system should be observed in order to rule out the possibility of a future overcompensatory response. A further complication is uncertainty surrounding the relative contribution of particular larval habitats to adult abundance [52, 53]. On one hand, our model assumes that each container's per-day larval food input scales with its surface area. On the other hand, substantial natural variability amongst containers of similar size and type is presumably found in the field. How to best measure and simulate heterogeneous container productivity is a question that deserves further attention.

**Cryptic Larval Habitat:** Estimating the prevalence and impact of cryptic larval habitat remains a key outstanding question in vector control, particularly in low-resource urban tropical settings. Most surveys of immature abundance in Iquitos, Peru and elsewhere focus on discrete, easily found containers [42]. However, there is increasing awareness that cryptic and otherwise overlooked larval habitats can contribute substantially to *Aedes* reproduction and vectorial capacity [53–61], and can impact the effectiveness of vector control efforts. Due to a lack field data, our model assumes an absence of cryptic habitat, which could explain the dramatic impact of container surveys (and associated container emptying) on simulated adult densities relative to field results (Figure 4). While we cannot directly assess the impact of cryptic habitat on adult abundance here, carefully designed experimental interventions (and simulations thereof) could nonetheless yield testable hypotheses about the relative contribution of cryptic habitat to *Aedes* reproduction and vectorial capacity.

**Microclimate:** In our model, container productivity also depends on temperature and precipitation. We used observations from a single automated monitoring station (located at the nearest airport) to estimate daily average temperature and total precipitation for the entire study area, recognizing that this point measurement cannot capture the spatial variability expected of precipitation, nor diurnal variation in temperature across the diversity of houses in the two study sites. Additional sources of variation include microclimate affecting container temperature (house construction materials, vegetation, etc.). Fine-scale spatial or temporal variation in air temperature is expected to affect adult life span [62], which would affect PrNF. Detailed biophysical models have used GIS data to estimate diurnal thermal cycles in larval

habitat [63], and intensive field monitoring of container water levels and temperature could yield valuable information regarding their spatial and temporal variability that could, in turn, inform models. High-precision monitoring of abiotic drivers over long time periods across many houses, however, is not logistically feasible in most settings where *Ae. aegypti* is common.

## Conclusion

An underlying motivation for this work was a better understanding of vector-borne disease transmission of dengue virus and other Flaviviruses. Numerous models (or systems of models) have directly integrated *Ae. aegypti* population dynamics with human epidemiological dynamics at varying levels of complexity [24, 64, 65]. A more conservative approach would combine the insights of separate simulation models and empirical lab and/or field results to arrive at specific testable hypotheses regarding the influence of mosquito vector ecology and population dynamics on virus transmission dynamics. Variation in disease driven by *Ae. aegypti*'s role in virus transmission is influenced by a wide range of factors, including weather and climate [37], movement patterns of human hosts and insect vectors [66], host immune history [67], virus variation, vector lifespan [68], and vector control measures [2]. Of these many factors, our model focuses exclusively on vector population dynamics and control measures. Our targeted insights can nonetheless be used as inputs into other simulation models, or to test specific hypotheses, such as the effect of insecticidal spraying on vector age distribution and population density.

We intentionally constructed SB2 to maintain compatibility with previous work that captured our general understanding of *Ae. aegypti* biology, e.g., SB and CIMSIM. Adding to the complexity of CIMSIM, SB incorporated spatial dynamics and demographic stochasticity, which are critical for studying invasion ecology and population genetics. SB2 was further modified to represent field studies with a high degree of spatial and temporal precision, e.g., house-based surveys and spraying. We note that SB2 (and SB) occupies an uncomfortable niche in ecological model complexity. It lacks the simplicity of mean-field models, yet makes a number of simplifying assumptions regarding insect biology and spatial processes. As such, our model is too complex for some uses (e.g., direct use by public health officials) and yet lacks sufficient detail for others (e.g., prediction). We expect that biotic and abiotic stochasticity, coupled with nonlinear population dynamics, fundamentally limit the fine-grained predictive power of any such population model. We nonetheless hope that SB2 will prove useful to identify research gaps and challenges that merit further investigation, to explore specific hypotheses about *Ae. aegypti* ecology and life history, and to design further large-scale field experiments.

The simulations presented here are based on the best available mechanistic model of two extensive and logistically complex field experiments in Iquitos, Peru. While our model's mechanistic complexity complicates attribution and interpretation, its granular structure permits a direct comparison between empirical and simulated results. This allowed us to highlight key areas of agreement, such as the effects of spraying on adult populations over time and space. We have also highlighted noteworthy disagreements where further investigation is warranted, such as the observed proportion of nulliparous females (PrNF) or positive containers (PrPC). Our results highlight the many challenges to effective ongoing vector control, from monitoring of spray efficacy, to rapid population rebound, to the potentially long time lags between control activities and population response.

## Software and Data Availability

Code and documentation for SB and SB2 is available at <https://github.com/helmingstay/SkeeterBuster>. Data will be available at <https://osf.io/jsfn8/> upon publication.

## Funding

This research was supported by funding from the National Institute of Allergy and Infectious Diseases under award numbers 5R01AI139085, R01-AI091980, and 1R01AI139085-01, and from the National Science Foundation under award number RTG/DMS-1246991.

## Acknowledgements

We thank Brandon Hollingsworth, Jaye Sudweeks, Sumit Dhole, and Jennifer Baltzegar for helpful discussion. We are grateful to the Ministerio de Agricultura y Riego de Peru, Direccion General Forestal y de Fauna Silvestre for permission to conduct these studies under the auspices of Resolución Directoral Nos. 128-2007-Inrena-IFFS-DCB, 415-2009-AG-DGFFS-DGEFFS, 0022-2011-AG-DGFFS-DGEFFS, 0330-11-AG-DGFFS -DGEFFS, and 0306-2013-MINAGRI-DGFFS/DGEFFS. We thank the residents of Iquitos, Peru for allowing us to undertake this study in and around their homes. We greatly appreciate support of the Loreto Regional Health Department including Dra. Wilma Casanova, Cristian Carey and Hugo Rodriguez-Ferruci, and Clara Del Aguila, Raul Pinedo, Roldan Cardenas, Carlos Pacheco and Enrique Chalco of the Department of Environmental Sanitation, Peruvian Ministry of Health, Iquitos, who all facilitated our work in Iquitos. Gerson Perez Rodriguez supervised the collection and processing of mosquitoes. Entomological surveys were carried out by Jhon Bardales Cardenas, Cesar Campos Cardenas, Jimmy Maykol Castillo Pizango, Willy Chavez, Fernando Chota Ruiz, Guillermo Elespuru Hidalgo, Victor Elespuru Hidalgo, Fernando Espinoza Benavides, Rusbel Huinapi Tamani, Guillermo Inapi Huaman, Nestor Jose Nonato Lancha, Federico Reategui Viena, Edson Pilco Mermao, Angel Puertas Lozano, Juan Luiz Sifuentes Rios, Manuel Ruiz Rioja, and Abner Enrique Varzallo Lachi. Jimmy Roberto Espinoza Benavides carried out data entry. We thank Gabriela Vasquez de la Torre, Lorena Quiroz, Alfonso Vizcarra, Esther Jennifer Rios, and Jhonny Cordova Lopez, for their support in community engagement, project execution and monitoring of MoH space sprays. Drs. Robert Hontz, Christopher Mores, Frederick Stell, Craig Stoops, Diego Munoz, Cecilia Gonzales, Kyle Peterson, Adam Armstrong, Guillermo Pimentel, Zoe Moran, Toane Zuleta and Ms. Roxana Lescano of the U.S. Naval Medical Research Unit No. 6 in Lima, Peru were instrumental in facilitating these studies.

## Disclaimer

The views expressed in this article are those of the author and do not necessarily reflect the official policy or position of the Department of the Navy, Department of Defense, nor the U.S. Government.

## Copyright statement

Some authors of this manuscript are military service members and employees of the U.S. Government. This work was prepared as part of their official duties. Title 17 U.S.C. §105 provides that copyright protection under this title is not available for any work of the United States Government. Title 17 U.S.C. §101 defines a U.S. Government work as a work prepared by a military service member or employee of the U.S. Government as part of that person's official duties.

## References

- [1] Samir Bhatt, Peter W Gething, Oliver J Brady, Jane P Messina, Andrew W Farlow, Catherine L Moyes, John M Drake, John S Brownstein, Anne G Hoen, Osman Sankoh, et al. The global distribution and burden of dengue. *Nature*, 496(7446):504–507, 2013.
- [2] Nicole L Achee, Fred Gould, T Alex Perkins, Robert C Reiner Jr, Amy C Morrison, Scott A Ritchie, Duane J Gubler, Remy Teyssou, and Thomas W Scott. A critical assessment of vector control for dengue prevention. *PLoS Negl Trop Dis*, 9(5):e0003655, 2015.

- [3] José Luis San Martín, Olivia Brathwaite, Betzana Zambrano, José Orlando Solórzano, Alain Bouckenooghe, Gustavo H Dayan, and María G Guzmán. The epidemiology of dengue in the americas over the last three decades: a worrisome reality. *The American journal of tropical medicine and hygiene*, 82(1):128–135, 2010.
- [4] Adi Utarini, Citra Indriani, Riris A Ahmad, Warsito Tantowijoyo, Eggi Arguni, M Ridwan Ansari, Endah Supriyati, D Satria Wardana, Yeti Meitika, Inggrid Ernesia, et al. Efficacy of wolbachia-infected mosquito deployments for the control of dengue. *New England Journal of Medicine*, 384(23):2177–2186, 2021.
- [5] Nicole L Achee, John P Grieco, Hassan Vatandoost, Gonçalo Seixas, Joao Pinto, Lee Ching-Ng, Ademir J Martins, Waraporn Juntarajumnong, Vincent Corbel, Clement Gouagna, et al. Alternative strategies for mosquito-borne arbovirus control. *PLoS neglected tropical diseases*, 13(1):e0006822, 2019.
- [6] Duane J Gubler. The global emergence/resurgence of arboviral diseases as public health problems. *Archives of Medical Research*, 33(4):330–342, 2002.
- [7] Duane J Gubler. Epidemic dengue/dengue hemorrhagic fever as a public health, social and economic problem in the 21st century. *Trends in Microbiology*, 10(2):100–103, 2002.
- [8] Maurício L Barreto and Maria G Teixeira. Dengue in brazil: epidemiological situation and contribution to a research agenda. *Estudos Avançados*, 22(64):53–72, 2008. URL <https://www.revistas.usp.br/eav/article/view/10348>.
- [9] Amy C Morrison, Emily Zielinski-Gutierrez, Thomas W Scott, and Ronald Rosenberg. Defining challenges and proposing solutions for control of the virus vector *Aedes aegypti*. *PLoS Med*, 5(3):e68, 2008.
- [10] Olaf Horstick, Silvia Runge-Ranzinger, Michael B Nathan, and Axel Kroeger. Dengue vector-control services: how do they work? a systematic literature review and country case studies. *Transactions of the Royal Society of Tropical Medicine and Hygiene*, 104(6):379–386, 2010.
- [11] Jacklyn Wong, Steven T Stoddard, Helvio Astete, Amy C Morrison, and Thomas W Scott. Oviposition site selection by the dengue vector *Aedes aegypti* and its implications for dengue control. *PLoS Negl Trop Dis*, 5(4):e1015, 2011.
- [12] Robert C Reiner Jr, Steven T Stoddard, Gonzalo M Vazquez-Prokopec, Helvio Astete, T Alex Perkins, Moises Sihuincha, Jeffrey D Stancil, David L Smith, Tadeuz J Kochel, Eric S Halsey, et al. Estimating the impact of city-wide *Aedes aegypti* population control: An observational study in iquitos, peru. *PLoS neglected tropical diseases*, 13(5):e0007255, 2019.
- [13] Thomas W Scott, Priyanie H Amerasinghe, Amy C Morrison, Leslie H Lorenz, Gary G Clark, Daniel Strickman, Pattamaporn Kittayapong, and John D Edman. Longitudinal studies of *Aedes aegypti* (diptera: Culicidae) in thailand and puerto rico: blood feeding frequency. *Journal of Medical Entomology*, 37(1):89–101, 2000.
- [14] Alongkot Ponlawat and Laura C Harrington. Blood feeding patterns of *Aedes aegypti* and *Aedes albopictus* in thailand. *Journal of medical entomology*, 42(5):844–849, 2005.
- [15] AC Morrison, H Astete, F Chapilliquen, G Ramirez-Prada, Gloria Diaz, A Getis, K Gray, and TW Scott. Evaluation of a sampling methodology for rapid assessment of *Aedes aegypti* infestation levels in iquitos, peru. *Journal of Medical Entomology*, 41(3):502–510, 2004.
- [16] Jennifer R Schneider, Amy C Morrison, Helvio Astete, Thomas W Scott, and Mark L Wilson. Adult size and distribution of *Aedes aegypti* (diptera: Culicidae) associated with larval habitats in iquitos, peru. *Journal of medical entomology*, 41(4):634–642, 2004.
- [17] D Ae Focks, DG Haile, E Daniels, and G Ae Mount. Dynamic life table model for *Aedes aegypti* (diptera: Culicidae): analysis of the literature and model development. *Journal of Medical Entomology*, 30(6):1003–1017, 1993.
- [18] Krisztian Magori, Mathieu Legros, Molly E Puente, Dana A Focks, Thomas W Scott, Alun L Lloyd, and Fred Gould. Skeeter Buster: A Stochastic, Spatially Explicit Modeling Tool for Studying *Aedes aegypti* Population Replacement and Population Suppression Strategies. *PLoS Neglected Tropical Diseases*, 3(9):e508, 2009.



- [19] Mathieu Legros, Marcelo Otero, Victoria Romeo Aznar, Hernan Solari, Fred Gould, and Alun L Lloyd. Comparison of two detailed models of *Aedes aegypti* population dynamics. *Ecosphere*, 7(10):e01515, 2016.
- [20] Somsakun Maneerat and Eric Daudé. A spatial agent-based simulation model of the dengue vector *Aedes aegypti* to explore its population dynamics in urban areas. *Ecological Modelling*, 333:66–78, 2016.
- [21] Robert C Reiner Jr, T Alex Perkins, Christopher M Barker, Tianchan Niu, Luis Fernando Chaves, Alicia M Ellis, Dylan B George, Arnaud Le Menach, Juliet RC Pulliam, Donal Bisanzio, et al. A systematic review of mathematical models of mosquito-borne pathogen transmission: 1970–2010. *Journal of The Royal Society Interface*, 10(81):20120921, 2013.
- [22] DA Focks, DG Haile, E Daniels, and GA Mount. Dynamic life table model for *Aedes aegypti* (diptera: Culicidae): simulation results and validation. *Journal of Medical Entomology*, 30(6):1018–1028, 1993.
- [23] Mathieu Legros, Krisztian Magori, Amy C Morrison, Chonggang Xu, Thomas W Scott, Alun L Lloyd, and Fred Gould. Evaluation of location-specific predictions by a detailed simulation model of *Aedes aegypti* populations. *PLOS ONE*, 6(7):e22701, 2011.
- [24] Dana A Focks, Eric Daniels, Dan G Haile, James E Keesling, et al. A simulation model of the epidemiology of urban dengue fever: literature analysis, model development, preliminary validation, and samples of simulation results. *American Journal of Tropical Medicine and Hygiene*, 53(5):489–506, 1995.
- [25] Michael A Johansson, Karyn M Apfeldorf, Scott Dobson, Jason Devita, Anna L Buczak, Benjamin Baugher, Linda J Moniz, Thomas Bagley, Steven M Babin, Erhan Guven, et al. An open challenge to advance probabilistic forecasting for dengue epidemics. *Proceedings of the National Academy of Sciences*, 116(48):24268–24274, 2019.
- [26] Sean M Cavany, Guido España, Alun L Lloyd, Lance A Waller, Uriel Kitron, Helvio Astete, William H Elson, Gonzalo M Vazquez-Prokopec, Thomas W Scott, Amy C Morrison, et al. Optimizing the deployment of ultra-low volume and targeted indoor residual spraying for dengue outbreak response. *PLoS computational biology*, 16(4):e1007743, 2020.
- [27] Alicia M Ellis, Andres J Garcia, Dana A Focks, Amy C Morrison, and Thomas W Scott. Parameterization and sensitivity analysis of a complex simulation model for mosquito population dynamics, dengue transmission, and their control. *The American journal of tropical medicine and hygiene*, 85(2):257–264, 2011.
- [28] Chonggang Xu, Mathieu Legros, Fred Gould, and Alun L Lloyd. Understanding Uncertainties in Model-Based Predictions of *Aedes aegypti* Population Dynamics. *PLoS Neglected Tropical Diseases*, 4(9):e830, 2010.
- [29] Rachael K Walsh, Cristobal L Aguilar, Luca Facchinelli, Laura Valerio, Janine M Ramsey, Thomas W Scott, Alun L Lloyd, and Fred Gould. Regulation of *Aedes aegypti* population dynamics in field systems: quantifying direct and delayed density dependence. *The American journal of tropical medicine and hygiene*, 89(1):68–77, 2013.
- [30] Anh Than, Fleur Ponton, and Juliano Morimoto. Integrative developmental ecology: a review of density-dependent effects on life-history traits and host-microbe interactions in non-social holometabolous insects. *Evolutionary Ecology*, 34:659–680, 2020.
- [31] Jennifer Baltzegar, Michael Vella, Christian Gunning, Gissella Vasquez, Helvio Astete, Fred Stell, Michael Fisher, Thomas W Scott, Audrey Lenhart, Alun L Lloyd, et al. Rapid evolution of knockdown resistance haplotypes in response to pyrethroid selection in *Aedes aegypti*. *bioRxiv*, 2021.
- [32] Christian E Gunning, Kenichi W Okamoto, Helvio Astete, Gissella M Vasquez, Erik Erhardt, Clara Del Aguila, Raul Pinedo, Roldan Cardenas, Carlos Pacheco, Enrique Chalco, et al. Efficacy of *Aedes aegypti* control by indoor ultra low volume (ulv) insecticide spraying in iquitos, peru. *PLoS Neglected Tropical Diseases*, 12(4):e0006378, 2018.
- [33] Kenichi W Okamoto, Michael A Robert, Alun L Lloyd, and Fred Gould. A reduce and replace strategy for suppressing vector-borne diseases: insights from a stochastic, spatial model. *PLOS ONE*, 8(12):e81860, 2013.
- [34] Arthur Getis, Amy C Morrison, Kenneth Gray, and Thomas W Scott. Characteristics of the spatial pattern of the dengue vector, *Aedes aegypti*, in iquitos, peru. *The American journal of tropical medicine and hygiene*, 69(5):494–505, 2003.

- [35] M. Palomino-Salcedo. Estado de susceptibilidad de la población natural de *Aedes aegypti* a los insecticidas en punchana-iquitos, región Loreto (noviembre 2014). Technical report, Instituto Nacional de Salud, Peru, 2014.
- [36] Genevieve LaCon, Amy C Morrison, Helvio Astete, Steven T Stoddard, Valerie A Paz-Soldan, John P Elder, Eric S Halsey, Thomas W Scott, Uriel Kitron, and Gonzalo M Vazquez-Prokopec. Shifting patterns of *Aedes aegypti* fine scale spatial clustering in Iquitos, Peru. *PLoS Negl Trop Dis*, 8(8):e3038, 2014.
- [37] Steven T Stoddard, Helen J Wearing, Robert C Reiner Jr, Amy C Morrison, Helvio Astete, Stalin Vilcarromero, Carlos Alvarez, Cesar Ramal-Asayag, Moises Sihuíncha, Claudio Rocha, et al. Long-term and seasonal dynamics of dengue in Iquitos, Peru. *PLoS neglected tropical diseases*, 8(7):e3003, 2014.
- [38] Gonzalo M Vazquez-Prokopec, William A Galvin, Rosmarie Kelly, and Uriel Kitron. A new, cost-effective, battery-powered aspirator for adult mosquito collections. *Journal of Medical Entomology*, 46(6):1256–1259, 2009. doi: <https://doi.org/10.1603/033.046.0602>.
- [39] Edgar Koyoc-Cardena, Anuar Medina-Barreiro, Azael Cohuo-Rodríguez, Norma Pavía-Ruz, Audrey Lenhart, Guadalupe Ayora-Talavera, Mike Dunbar, Pablo Manrique-Saide, and Gonzalo Vazquez-Prokopec. Estimating absolute indoor density of *Aedes aegypti* using removal sampling. *Parasites & vectors*, 12(1):1–11, 2019.
- [40] Melissa Tracy, Magdalena Cerdá, and Katherine M Keyes. Agent-based modeling in public health: current applications and future directions. *Annual review of public health*, 39:77–94, 2018.
- [41] Naomi Oreskes. Evaluation (not validation) of quantitative models. *Environmental health perspectives*, 106(suppl 6):1453–1460, 1998.
- [42] Amy C Morrison, Kenneth Gray, Arthur Getis, Helvio Astete, Moises Sihuíncha, Dana Focks, Douglas Watts, Jeffrey D Stancil, James G Olson, Patrick Blair, et al. Temporal and geographic patterns of *Aedes aegypti* (Diptera: Culicidae) production in Iquitos, Peru. *Journal of medical entomology*, 41(6):1123–1142, 2004.
- [43] Laura C Harrington, Françoise Vermeulen, James J Jones, Sangvorn Kitthawee, Ratana Sithiprasasna, John D Edman, and Thomas W Scott. Age-dependent survival of the dengue vector *Aedes aegypti* (Diptera: Culicidae) demonstrated by simultaneous release–recapture of different age cohorts. *Journal of medical entomology*, 45(2):307–313, 2008.
- [44] Linda M Styer, James R Carey, Jane-Ling Wang, and Thomas W Scott. Mosquitoes do senesce: departure from the paradigm of constant mortality. *The American journal of tropical medicine and hygiene*, 76(1):111–117, 2007.
- [45] John P Buonaccorsi, Laura C Harrington, and John D Edman. Estimation and comparison of mosquito survival rates with release-recapture-removal data. *Journal of Medical Entomology*, 40(1):6–17, 2003.
- [46] Teresa K Joy, Eileen H Jeffrey Gutierrez, Kacey Ernst, Kathleen R Walker, Yves Carriere, Mohammad Torabi, and Michael A Riehle. Aging field collected *Aedes aegypti* to determine their capacity for dengue transmission in the southwestern United States. *PLOS ONE*, 7(10):e46946, 2012.
- [47] Kacey C Ernst, Kathleen R Walker, Pablo Reyes-Castro, Teresa K Joy, A Lucia Castro-Luque, Rolando E Diaz-Caravantes, Mercedes Gameros, Steven Haenchen, Mary H Hayden, Andrew Monaghan, et al. *Aedes aegypti* (Diptera: Culicidae) longevity and differential emergence of dengue fever in two cities in Sonora, Mexico. *Journal of medical entomology*, 54(1):204–211, 2017.
- [48] Michael E Gilpin and GA McClelland. Systems analysis of the yellow fever mosquito *Aedes aegypti*. *Fortschritte der Zoologie*, 25(2-3):355, 1979.
- [49] Penelope A Hancock, Vanessa L White, Ashley G Callahan, Charles HJ Godfray, Ary A Hoffmann, and Scott A Ritchie. Density-dependent population dynamics in *Aedes aegypti* slow the spread of *Wolbachia*. *Journal of Applied Ecology*, 53(3):785–793, 2016.
- [50] RK Walsh, CL Aguilar, L Facchinelli, L Valerio, JM Ramsey, TW Scott, AL Lloyd, and F Gould. Assessing the impact of direct and delayed density dependence in natural larval populations of *Aedes aegypti*. *American Journal of Tropical Medicine and Hygiene*, 89:68–77, 2013.

- [51] RM May, GR Conway, MP Hassell, and TRE Southwood. Time delays, density-dependence and single-species oscillations. *The Journal of Animal Ecology*, pages 747–770, 1974.
- [52] Tessa B Knox, Yen T Nguyen, Nam S Vu, Brian H Kay, and Peter A Ryan. Quantitative relationships between immature and emergent adult *Aedes aegypti* (diptera: Culicidae) populations in water storage container habitats. *Journal of medical entomology*, 47(5):748–758, 2010.
- [53] Daniel Pilger, Audrey Lenhart, Pablo Manrique-Saide, Joao Bosco Siqueira, Wellington Tristão Da Rocha, and Axel Kroeger. Is routine dengue vector surveillance in central brazil able to accurately monitor the *Aedes aegypti* population? results from a pupal productivity survey. *Tropical Medicine & International Health*, 16(9):1143–1150, 2011.
- [54] W Tun-Lin, BH Kay, and ANDA Barnes. Understanding productivity, a key to *Aedes aegypti* surveillance. *The American journal of tropical medicine and hygiene*, 53(6):595–601, 1995.
- [55] BH Kay, PA Ryan, BM Russell, JS Holt, SA Lyons, and PN Foley. The importance of subterranean mosquito habitat to arbovirus vector control strategies in north queensland, australia. *Journal of medical entomology*, 37(6):846–853, 2000.
- [56] Dana A Focks and Neal Alexander. Multicountry study of *Aedes aegypti* pupal productivity survey methodology: findings and recommendations. Technical report, World Health Organization, 2006.
- [57] Roberto Barrera, Manuel Amador, A Diaz, J Smith, JL Munoz-Jordan, and Y Rosario. Unusual productivity of *Aedes aegypti* in septic tanks and its implications for dengue control. *Medical and veterinary entomology*, 22(1):62–69, 2008.
- [58] Roger Arana-Guardia, Carlos M Baak-Baak, María Alba Loroño-Pino, Carlos Machain-Williams, Barry J Beaty, Lars Eisen, and Julián E García-Rejón. Stormwater drains and catch basins as sources for production of *Aedes aegypti* and *Culex quinquefasciatus*. *Acta tropica*, 134:33–42, 2014.
- [59] Igor Adolfo Dexheimer Paploski, Moreno S Rodrigues, Vánio André Mugabe, Mariana Kikuti, Aline S Tavares, Mitermayer Galvão Reis, Uriel Kitron, and Guilherme Sousa Ribeiro. Storm drains as larval development and adult resting sites for *Aedes aegypti* and *Aedes albopictus* in salvador, brazil. *Parasites & Vectors*, 9(1):1–8, 2016.
- [60] Julian E Garcia-Rejon, Armando Ulloa-Garcia, Nohemi Cigarroa-Toledo, Angelica Pech-May, Carlos Machain-Williams, Rosa Carmina Cetina-Trejo, Lourdes Gabriela Talavera-Aguilar, Oswaldo Margarito Torres-Chable, Juan Carlos Navarro, and Carlos Marcial Baak-Baak. Study of *Aedes aegypti* population with emphasis on the gonotrophic cycle length and identification of arboviruses: implications for vector management in cemeteries. *Revista do Instituto de Medicina Tropical de São Paulo*, 60, 2018.
- [61] Philip K Stoddard. Managing *Aedes aegypti* populations in the first zika transmission zones in the continental united states. *Acta Tropica*, 187:108–118, 2018.
- [62] Daniella Goindin, Christelle Delannay, Cédric Ramdini, Joël Gustave, and Florence Fouque. Parity and longevity of *Aedes aegypti* according to temperatures in controlled conditions and consequences on dengue transmission risks. *PLOS ONE*, 10(8):e0135489, 2015.
- [63] Michael Kearney, Warren P Porter, Craig Williams, Scott Ritchie, and Ary A Hoffmann. Integrating biophysical models and evolutionary theory to predict climatic impacts on species’ ranges: the dengue mosquito *Aedes aegypti* in australia. *Functional Ecology*, 23(3):528–538, 2009.
- [64] EA Newton and Paul Reiter. A model of the transmission of dengue fever with an evaluation of the impact of ultra-low volume (ulv) insecticide applications on dengue epidemics. *The American Journal of Tropical Medicine and Hygiene*, 47(6):709–720, 1992.
- [65] M Otero and HG Solari. Stochastic eco-epidemiological model of dengue disease transmission by *Aedes aegypti* mosquito. *Mathematical Biosciences*, 223(1):32–46, 2010.

- [66] Steven T Stoddard, Brett M Forshey, Amy C Morrison, Valerie A Paz-Soldan, Gonzalo M Vazquez-Prokopec, Helvio Astete, Robert C Reiner, Stalin Vilcarromero, John P Elder, Eric S Halsey, et al. House-to-house human movement drives dengue virus transmission. *Proceedings of the National Academy of Sciences*, 110(3):994–999, 2013.
- [67] Goro Kuno. *Factors influencing the transmission of dengue viruses*, chapter 4, pages 61–88. 1997.
- [68] Miranda Chan and Michael A Johansson. The incubation periods of dengue viruses. *PLOS ONE*, 7(11):e50972, 2012.

## Supplemental Tables and Figures

Table S1: House counts in the baseline circuit (C1) of each experiment, showing the proportion of houses with and without successful surveys. When available, baseline surveys were used to parameterize each house's container configuration.

| Experiment | Survey | Houses | Proportion |
|------------|--------|--------|------------|
| S-2013     | Yes    | 943    | 0.719      |
| S-2013     | No     | 368    | 0.281      |
| L-2014     | Yes    | 1470   | 0.659      |
| L-2014     | No     | 762    | 0.341      |



Table S2: Key parameters of default scenario. Dispersal parameters show per-day probabilities. Container food input multiplier was determined by matching mean adult populations in the buffer sector between model and data (including both experiments together). Spray efficacy was empirically determined for each experiment from observed cage mortality: S-2013=0.91; L-2014=0.72. Finally, spray efficacy was systematically varied from the default scenario (Low=0.5; High=1).

| Parameter                                           | Value |
|-----------------------------------------------------|-------|
| nulliparous_female_adult_long_range_dispersal       | 0.001 |
| parous_female_adult_long_range_dispersal            | 0.001 |
| male_adult_long_range_dispersal                     | 0.001 |
| container_movement_probability                      | 0     |
| nulliparous_female_adult_dispersal                  | 0.1   |
| parous_female_adult_dispersal                       | 0.1   |
| male_adult_dispersal                                | 0.1   |
| nulliparous_female_adult_dispersal_from_empty_house | 0.1   |
| parous_female_adult_dispersal_from_empty_house      | 0.1   |
| male_adult_dispersal_when_no_female                 | 0.1   |
| do_adult_spraying                                   | TRUE  |
| do_cont_sampling                                    | TRUE  |
| do_adult_sampling                                   | TRUE  |
| proportion_of_adult_females_sampled                 | 0.29  |
| proportion_of_adult_males_sampled                   | 0.29  |
| food_input_multiplier                               | 0.65  |

Table S3: Ratio of sector means (spray / buffer) by circuit, as in Figure 7. Values show ensemble summary (default scenario): **median** 95% PI (empirical). \* denotes spray circuits. See also Figure 7 and Table S4.

| Exper. | Circuit | AA/HSE                       | AHI                          | PrNF                        | PC/HSE                       |
|--------|---------|------------------------------|------------------------------|-----------------------------|------------------------------|
| S-2013 | C1      | <b>0.89</b> 0.77-1 (1.5)     | <b>0.95</b> 0.82-1.1 (1.1)   | <b>1.1</b> 0.91-1.3 (2)     | <b>0.95</b> 0.92-0.97 (0.98) |
|        | C2 *    | <b>0.53</b> 0.4-0.66 (0.26)  | <b>0.62</b> 0.49-0.79 (0.38) | <b>1.7</b> 1.4-2.1 (0.95)   | -                            |
|        | C3      | <b>0.37</b> 0.28-0.46 (0.41) | <b>0.46</b> 0.37-0.57 (0.6)  | <b>1.1</b> 0.88-1.4 (0.33)  | <b>0.49</b> 0.42-0.56 (0.41) |
|        | C4      | <b>0.56</b> 0.4-0.75 (0.84)  | <b>0.62</b> 0.47-0.81 (0.74) | <b>1</b> 0.82-1.3 (1.1)     | <b>0.57</b> 0.45-0.67 (1.2)  |
| L-2014 | C1      | <b>0.94</b> 0.85-1.1 (1.2)   | <b>0.95</b> 0.87-1 (1.1)     | <b>1.1</b> 0.86-1.3 (2)     | <b>0.97</b> 0.93-1 (1)       |
|        | C2      | <b>0.9</b> 0.61-1.3 (0.9)    | <b>0.85</b> 0.59-1.2 (0.89)  | <b>1.2</b> 0.66-2.2 (0.088) | -                            |
|        | C3 *    | <b>0.94</b> 0.7-1.3 (0.82)   | <b>0.96</b> 0.72-1.4 (1.1)   | <b>1.1</b> 0.81-1.5 (1.1)   | -                            |
|        | C4      | <b>0.9</b> 0.78-1.1 (0.91)   | <b>0.93</b> 0.78-1 (0.88)    | <b>0.98</b> 0.81-1.2 (1.7)  | <b>0.9</b> 0.84-0.96 (1.1)   |
|        | C5      | <b>1</b> 0.81-1.3 (1.5)      | <b>0.98</b> 0.82-1.2 (1.3)   | <b>1</b> 0.82-1.2 (1.4)     | -                            |
|        | C6 *    | <b>0.57</b> 0.47-0.67 (0.67) | <b>0.61</b> 0.52-0.71 (0.52) | <b>1.4</b> 1.2-1.5 (3.5)    | -                            |
|        | C7      | <b>0.57</b> 0.46-0.67 (0.71) | <b>0.63</b> 0.51-0.74 (0.82) | <b>1</b> 0.82-1.3 (1.3)     | <b>0.64</b> 0.58-0.71 (0.82) |
|        | C8      | <b>0.81</b> 0.7-0.97 (1.9)   | <b>0.79</b> 0.67-0.92 (1.5)  | <b>1</b> 0.87-1.3 (1)       | <b>0.85</b> 0.78-0.94 (1)    |
|        | C9      | <b>0.91</b> 0.74-1.1 (2.5)   | <b>0.86</b> 0.73-1 (1.6)     | <b>1</b> 0.8-1.2 (3.7)      | <b>0.88</b> 0.81-0.97 (1.6)  |

Table S4: Ratio of circuit means (indicated circuit / baseline) within the spray sector (values as in Table S3). See also Figure 7.

| Exper. | Circuit | AA/HSE                       | AHI                          | PrNF                        | PC/HSE                       |
|--------|---------|------------------------------|------------------------------|-----------------------------|------------------------------|
| S-2013 | C2 *    | <b>0.25</b> 0.19-0.31 (0.17) | <b>0.38</b> 0.3-0.46 (0.35)  | <b>1.6</b> 1.3-1.9 (0.4)    | -                            |
|        | C3      | <b>0.31</b> 0.24-0.38 (0.55) | <b>0.4</b> 0.32-0.48 (0.79)  | <b>1.1</b> 0.91-1.5 (0.16)  | <b>0.45</b> 0.39-0.52 (0.75) |
|        | C4      | <b>0.27</b> 0.2-0.36 (0.89)  | <b>0.36</b> 0.28-0.47 (1.1)  | <b>1.2</b> 0.92-1.6 (0.79)  | <b>0.49</b> 0.4-0.57 (2)     |
| L-2014 | C2      | <b>0.43</b> 0.31-0.61 (0.85) | <b>0.52</b> 0.4-0.67 (0.86)  | <b>0.91</b> 0.62-1.3 (0.43) | -                            |
|        | C3 *    | <b>0.3</b> 0.23-0.38 (0.39)  | <b>0.39</b> 0.31-0.48 (0.54) | <b>1.4</b> 1.1-1.8 (1.6)    | -                            |
|        | C4      | <b>0.56</b> 0.47-0.67 (0.69) | <b>0.64</b> 0.55-0.72 (0.69) | <b>1.3</b> 1.1-1.6 (1.7)    | <b>0.64</b> 0.59-0.67 (0.85) |
|        | C5      | <b>0.66</b> 0.55-0.79 (0.88) | <b>0.71</b> 0.61-0.82 (0.83) | <b>1.2</b> 0.96-1.4 (1.3)   | -                            |
|        | C6 *    | <b>0.43</b> 0.37-0.49 (0.4)  | <b>0.49</b> 0.43-0.55 (0.33) | <b>1.6</b> 1.4-1.8 (3)      | -                            |
|        | C7      | <b>0.48</b> 0.4-0.56 (0.67)  | <b>0.53</b> 0.45-0.62 (0.66) | <b>1.1</b> 0.88-1.3 (1.5)   | <b>0.49</b> 0.45-0.53 (1.2)  |
|        | C8      | <b>0.59</b> 0.51-0.71 (1.5)  | <b>0.62</b> 0.54-0.72 (1)    | <b>1.2</b> 1-1.4 (0.69)     | <b>0.59</b> 0.55-0.64 (0.59) |
|        | C9      | <b>0.82</b> 0.67-0.95 (1.7)  | <b>0.74</b> 0.66-0.89 (1.2)  | <b>1.1</b> 0.86-1.3 (1.6)   | <b>0.71</b> 0.66-0.76 (0.69) |

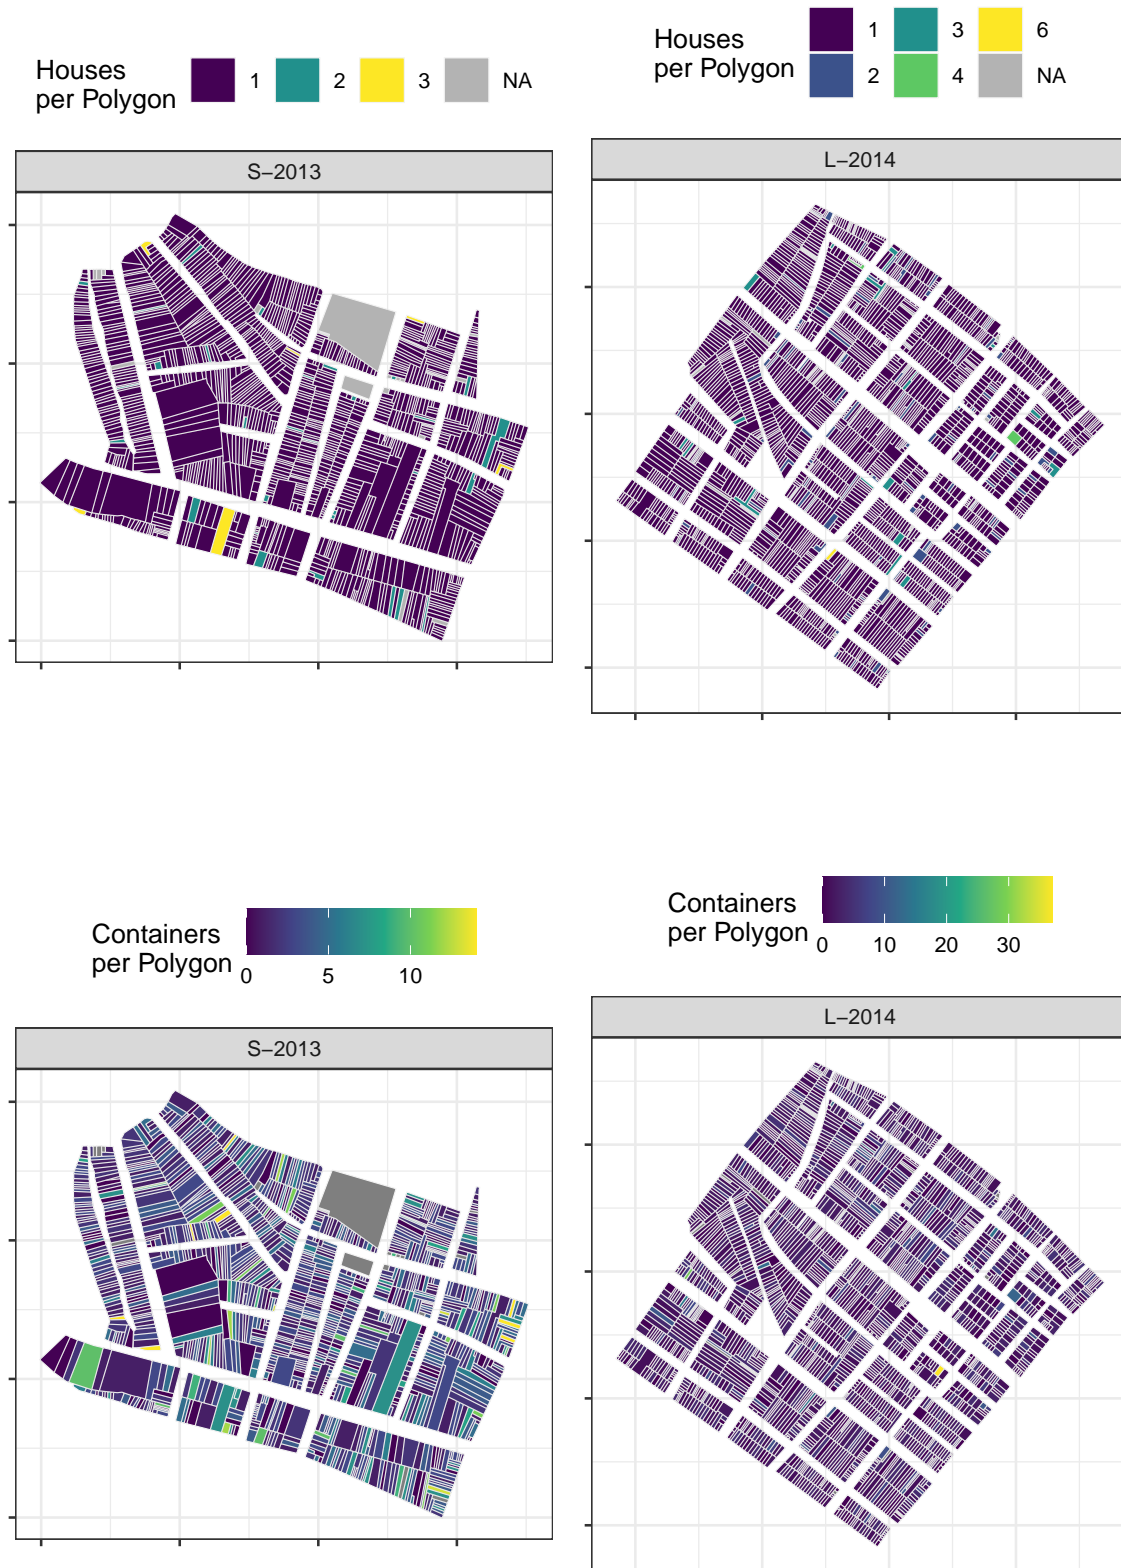

Figure S1: Map of simulation configuration, showing houses per polygon (top row) and containers per polygon (bottom row). See also Figure 2.

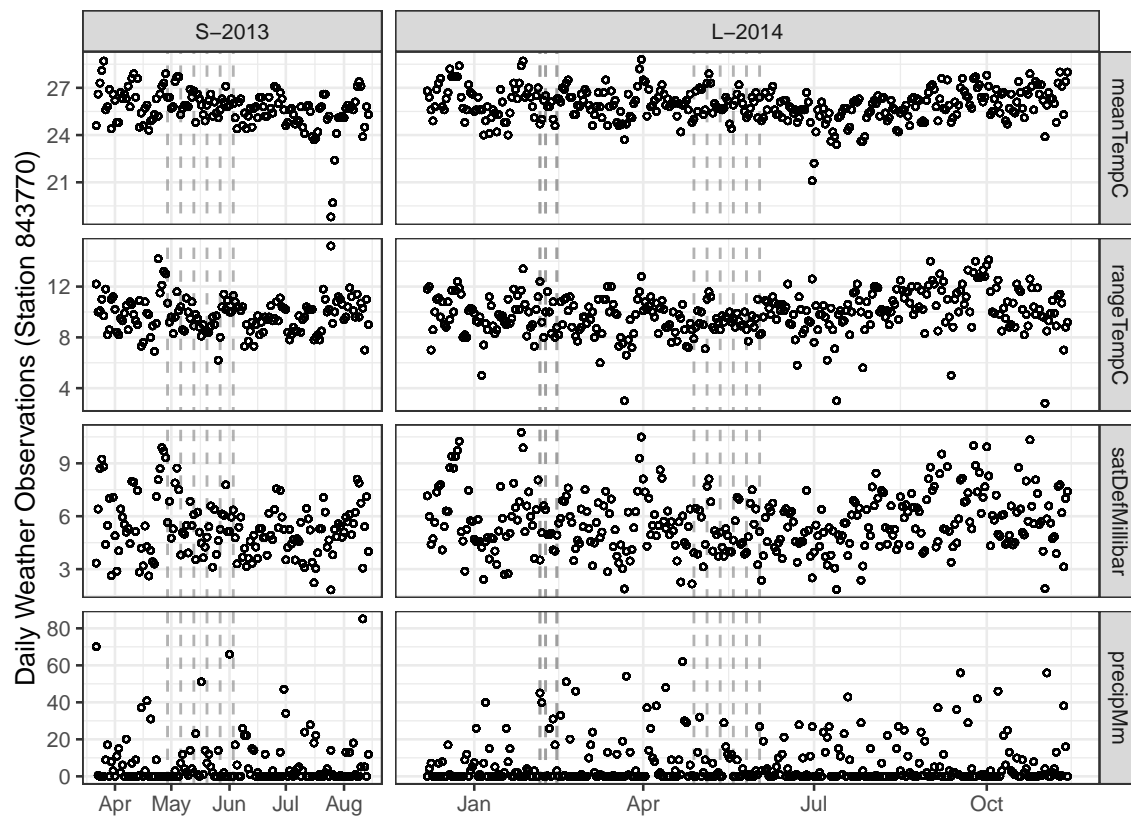

Figure S2: Daily time series of observed weather at station 843770. Vertical dashed lines show spray events (see Figure 3).

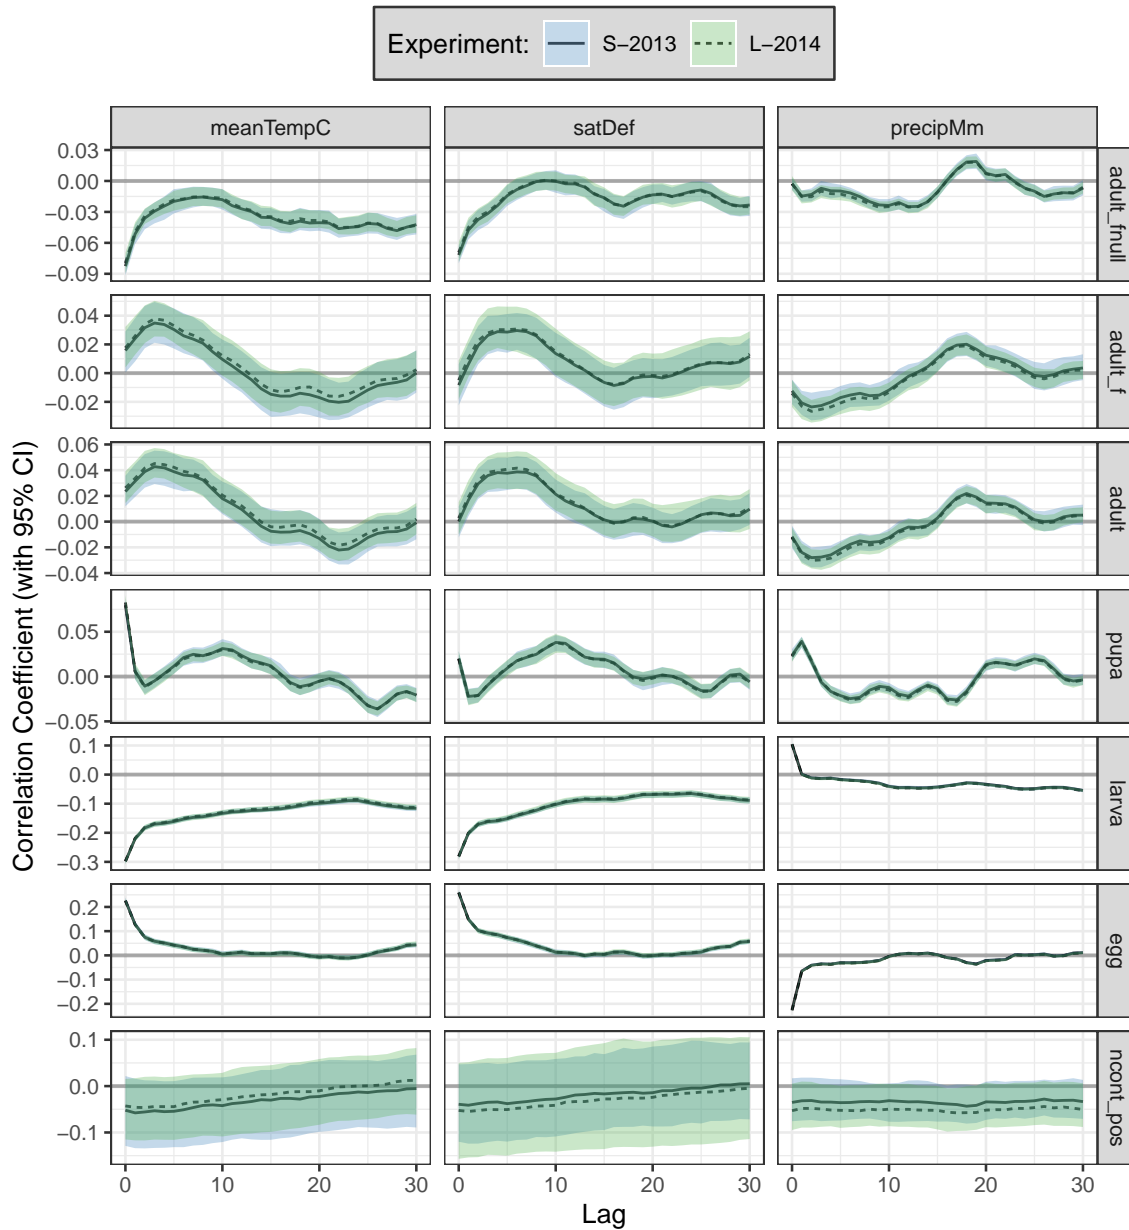

Figure S3: Correlation between weather and insect populations at different life stages for long-running scenario. Adult females closely track total adult populations, while eggs and larvae have an inverse response as eggs transition into larvae. In the short-term (<5 days), increased temperature and humidity yield increases in adults and eggs, and a decrease in proportion nulliparous females; precipitation causes eggs to hatch into larvae, while increased temperatures cause larvae to develop into pupae. High humidity is also associated with lower larval populations across a range of time lags, most strongly at <10 days. In the medium to long-term (10-20 days), increased temperature and humidity was associated with increased pupal populations (peak correlation at approx. 10 days), while precipitation was associated with increased adult populations (peak correlation at approx. 18 days). No consistent correlation between weather and number of positive containers per house is evident.



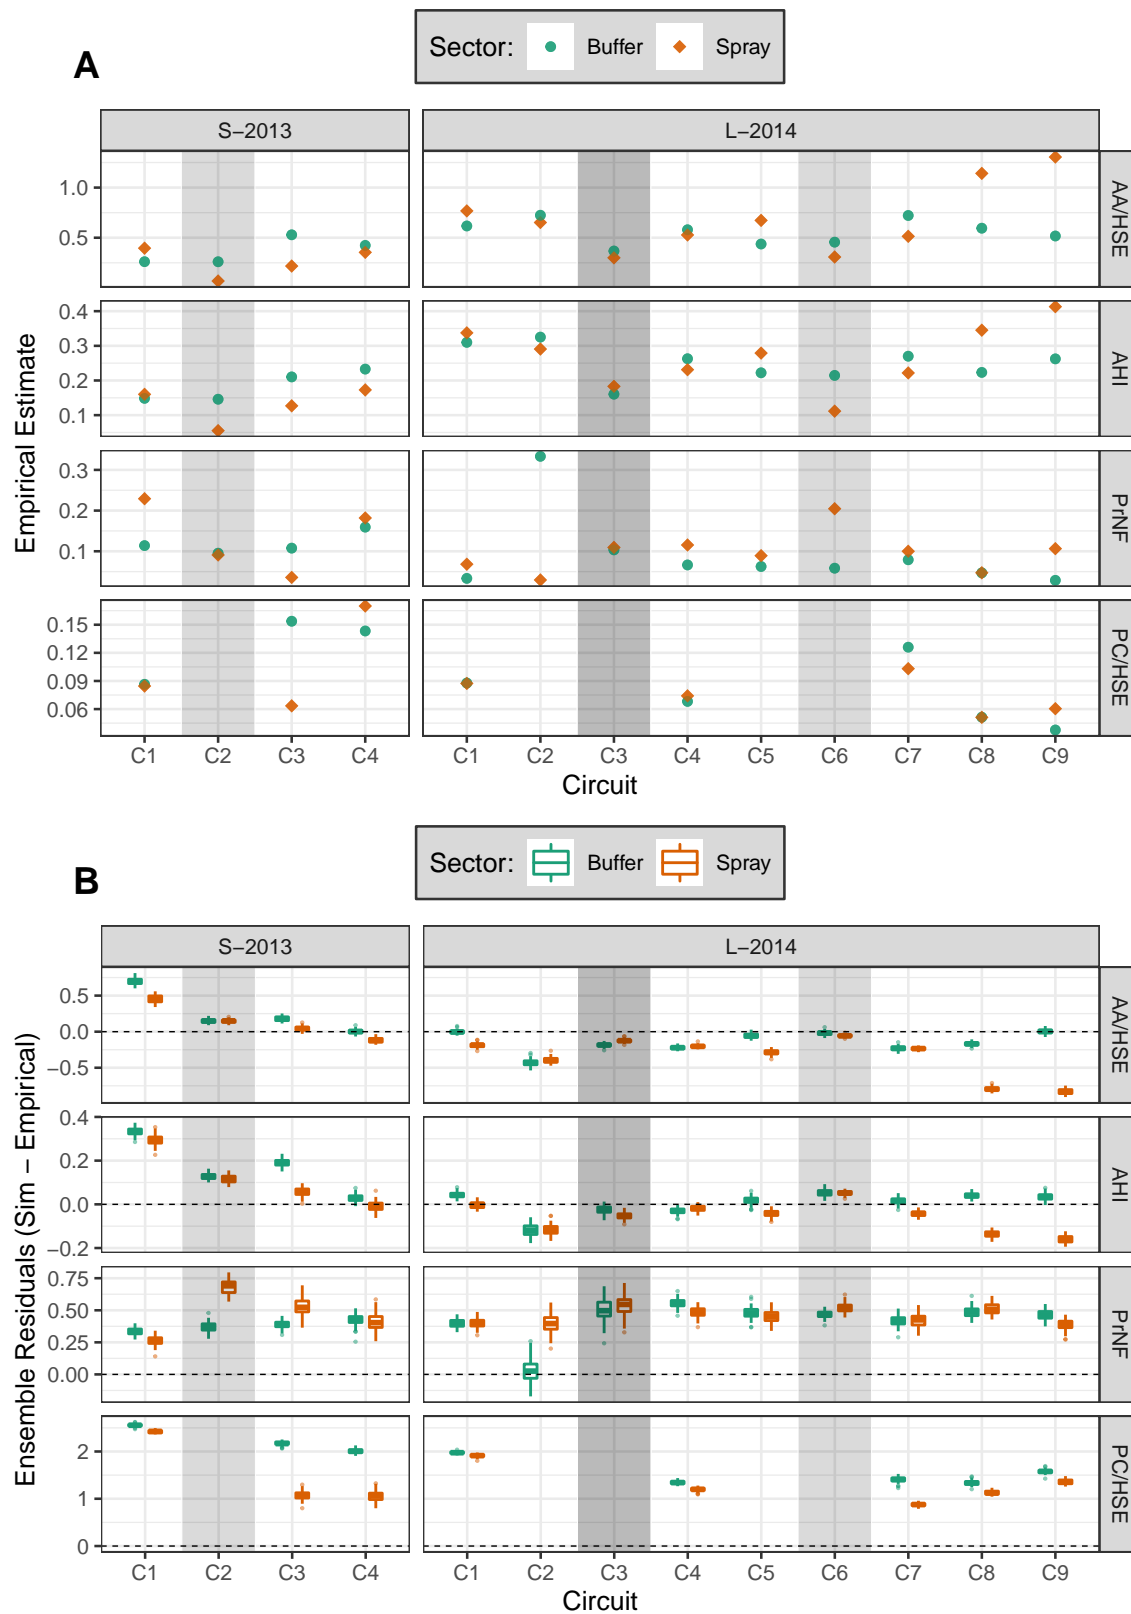

Source: http://biorxiv.org/content/10.1101/2021.10.03.462931v1.full.pdf
